# Supplementary material for: Exploiting science? A systematic analysis of complementary and alternative medicine clinic websites’ marketing of stem cell therapies
Source: PubMed Central journal article supplement — BMJ Open. 2018 Feb 28;8(2):e019414. doi: 10.1136/bmjopen-2017-019414 (PMC5855243; doi:10.1136/bmjopen-2017-019414), 2018-02-28
Supplement: bmjopen-2017-019414.draft_revisions.pdf [file bmjopen-2017-019414.draft_revisions.pdf]

# BMJ Open

BMJ Open is committed to open peer review. As part of this commitment we make the peer review history of every article we publish publicly available.

When an article is published we post the peer reviewers' comments and the authors' responses online. We also post the versions of the paper that were used during peer review. These are the versions that the peer review comments apply to.

The versions of the paper that follow are the versions that were submitted during the peer review process. They are not the versions of record or the final published versions. They should not be cited or distributed as the published version of this manuscript.

BMJ Open is an open access journal and the full, final, typeset and author-corrected version of record of the manuscript is available on our site with no access controls, subscription charges or pay-per-view fees (<http://bmjopen.bmj.com>).

If you have any questions on BMJ Open's open peer review process please email [editorial.bmjopen@bmj.com](mailto:editorial.bmjopen@bmj.com)

# BMJ Open

## Exploiting science? A systematic analysis of complementary and alternative medicine clinic websites' marketing of stem cell therapies

|                                    |                                                                                                                                                                                                                                                                |
|------------------------------------|----------------------------------------------------------------------------------------------------------------------------------------------------------------------------------------------------------------------------------------------------------------|
| Journal:                           | <i>BMJ Open</i>                                                                                                                                                                                                                                                |
| Manuscript ID                      | bmjopen-2017-019414                                                                                                                                                                                                                                            |
| Article Type:                      | Research                                                                                                                                                                                                                                                       |
| Date Submitted by the Author:      | 31-Aug-2017                                                                                                                                                                                                                                                    |
| Complete List of Authors:          | Murdoch, Blake; University of Alberta, Health Law Institute, Faculty of Law<br>Zarzeczny, Amy; University of Regina, Johnson Shoyama Graduate School<br>of Public Policy<br>Caulfield, Timothy; University of Alberta, Health Law Institute, Faculty of<br>Law |
| <b>Primary Subject<br>Heading</b>: | Complementary medicine                                                                                                                                                                                                                                         |
| Secondary Subject Heading:         | Rehabilitation medicine, Communication                                                                                                                                                                                                                         |
| Keywords:                          | Stem Cells, COMPLEMENTARY MEDICINE, Marketing                                                                                                                                                                                                                  |
|                                    |                                                                                                                                                                                                                                                                |

SCHOLARONE™  
Manuscripts

## Exploiting science? A systematic analysis of complementary and alternative medicine clinic websites' marketing of stem cell therapies

Blake Murdoch<sup>i</sup>, Amy Zarzeczny<sup>ii</sup> and Timothy Caulfield<sup>iii</sup>

<sup>i</sup> Health Law Institute, Faculty of Law, University of Alberta, Edmonton, Alberta, Canada

<sup>ii</sup> Johnson Shoyama Graduate School of Public Policy, University of Regina, Regina, Saskatchewan, Canada

<sup>iii</sup> Health Law Institute, Faculty of Law; Law Centre, University of Alberta, 91 University Campus NW, Edmonton, Alberta T6G 2H5; 780-492-9575; caulfield@ualberta.ca

### Abstract

**Objective:** To identify the frequency and qualitative characteristics of stem cell-related marketing claims made on websites of clinics featuring common types of complementary and alternative medicine practitioners.

**Design:** Systematic website analysis.

**Setting:** Global. United States and English language bias due to methodology.

**Main outcome measures:** Representations as to: practitioner types, stem cell therapies and their targets, stem cell-related interventions. Statements in relation to stem cell therapies as to: evidence of inefficacy, limited evidence of efficacy, general procedural risks, risks specific to the mode of therapy, regulatory status, experimental or unproven nature of therapy. Use of hype language.

**Results:** 243 websites offered stem cell therapies. Many websites advertised stem cell transplantation from multiple sources, such as adipose-derived (112), bone marrow-derived (100), blood-derived (28), umbilical cord-derived (26), and others. Plant stem cell-based treatments and products (20) were also advertised. Purposes for and targets of treatment included pain, physical injury, a wide range of diseases and illnesses, cosmetic concerns, non-cosmetic aging, sexual enhancement, and others. Medical doctors (130), chiropractors (53) and naturopaths (44) commonly work in the clinics we found to be offering stem cell therapies. Many clinic websites advertising stem cell therapies lacked important additional information, including: statements about evidence of inefficacy (present on only 12.76% of websites), statements about limited evidence of efficacy (18.93%), statements of general risks (24.69%), statements of risks specific to the mode(s) of therapy (5.76%), statements as to the regulatory status of the therapies (30.86%), and statements that the therapy is experimental or unproven (33.33%). Hype language was noted (31.69%).

**Conclusions:** Stem cell therapies and related interventions are marketed for a wide breadth of conditions, and are being offered by complementary and alternative practitioners, often in conjunction with medical doctors. Consumer protection and truth-in-advertising regulation could play important roles in addressing misleading marketing practices in this area.

### Strengths and Limitations of This Study

- The involvement of complementary and alternative medicine practitioners in the marketing of stem cell therapies and stem cell-related interventions is

1  
2  
3 understudied, and this research helps us understand the extent to which they are  
4 involved, and also the extent to which they collaborate with medical professionals.

- 5 • The methodology was designed in such a way that human error was minimized;  
6 manual searching of websites was largely replaced by automated domain searches  
7 by Google, which helped coders to achieve near perfect agreement in Cohen's Kappa  
8 reliability testing.
- 9 • The search terms selected did not fully encompass the gamut of existing CAM  
10 practitioner types, omitting some less common types such as reiki providers,  
11 reflexologists, etc.
- 12 • Because the coding frame was applied solely to the specific webpages on web  
13 domains where the term "stem cell" was found by Google, and not to the entirety of  
14 existing content on a given domain, it is possible that broad disclaimers and other  
15 relevant information were excluded.

### 19 **Funding Statement**

20 This work was supported by the Stem Cell Network, grant number FY17/PP1 RES0032389,  
21 and the Trudeau Foundation, grant number RES0019335.

### 24 **Competing Interests Statement**

25 The authors declare no competing interests.

### 28 **Data Sharing Statement**

29 Original dataset and time-stamped screenshots of all example statements found in the  
30 tables are available upon request to the corresponding author.

### 33 **Acknowledgments**

34 The authors would like to thank Robyn Hyde-Lay for her advice and guidance, and for her  
35 aid in developing applications to secure funding for this project. The authors would also  
36 like to thank research assistants Daniel Downie, Yassine El Balhouli and Corinna Liu for  
37 their help with data collection.

### 40 **Author Contribution Statement**

41 Murdoch, Zarzeczny and Caulfield designed the study, analyzed the data and wrote the  
42 manuscript. Daniel Downie, Yassine El Balhouli and Corinna Liu completed the coding.

### 44 **Introduction**

45  
46 Stem cell research has considerable clinical potential and scientific discoveries continue to  
47 advance our knowledge in this field.[1,2] Yet, despite enthusiastic media coverage of the  
48 field,[3] only a few stem cell-based therapies are currently ready for clinical application.[4-  
49 6] This reality has not stopped the proliferation of clinics around the world advertising a  
50 wide array of unproven stem cell-based interventions.[7-9] Many of these clinics use a  
51 direct-to-consumer marketing system based on an online presence. [10,11] While much of  
52 the early growth in the commercial market for unproven stem cell-based interventions  
53 occurred in Asia,[12] it is currently spreading to jurisdictions commonly seen as having  
54  
55  
56  
57  
58  
59  
60

1  
2  
3 robust regulatory regimes, including the United States and Australia.[13,14] Furthermore,  
4 complementary and alternative medicine [CAM] practitioners have begun to offer stem  
5 cell-based interventions, marking a further expansion of this market.  
6

7  
8 Many of these interventions are marketed despite lack of approval by relevant regulatory  
9 bodies like the U.S Food and Drug Administration's [FDA's] Center for Biologics Evaluation  
10 and Research.[10] The market also continues to flourish despite denunciation by research  
11 bodies like the International Society of Stem Cell Research,[5] cautions issued by  
12 professional societies,[15] and legislative attempts to constrain it,[16] among other efforts.  
13 The apparent resilience of this market suggests regulators and policymakers need to  
14 explore diverse approaches for addressing the various concerns associated with it.[17]  
15

16  
17 Consumer protection and truth-in-advertising laws have been proposed as potentially  
18 useful avenues of response,[18] as has greater use of professional discipline to govern the  
19 conduct of providers who are members of regulated health professions.[19] In order to  
20 evaluate the potential utility of these and other related strategies, it is important to  
21 understand, first, what kinds of healthcare providers are purportedly providing these  
22 unproven interventions, and second, how these services are being marketed to the public  
23 (i.e. are the claims being made potentially inaccurate or misleading?). Identifying the  
24 professional status of those involved in the marketing of unproven stem cell-based  
25 interventions is necessary for ascertaining whether or not they are subject to professional  
26 regulation, and if so, what relevant rules govern their conduct in this field. At the same  
27 time, gathering data on the specific nature of the claims being made will highlight where  
28 existing consumer protection and truth-in-advertising laws may be triggered.  
29  
30  
31

32  
33 The ways in which CAM practitioners (as well as interdisciplinary clinics featuring CAM  
34 practitioners) use stem cells to market their services and the nature of the claims they are  
35 making have not yet been sufficiently studied. Accordingly, the goal of this research was to  
36 identify CAM providers advertising stem cell-related interventions via publicly accessible  
37 websites, and then to map the types of claims being made about those interventions. We  
38 first sought to identify relevant clinic websites using search terms focused on CAM  
39 practitioner types (e.g. "naturopaths") and common CAM terminology (e.g. "holistic"), and  
40 then to analyze the information presented on those clinic websites about stem cell and  
41 stem cell-related therapies.  
42  
43

## 44 **Methods**

45  
46 In order to establish a dataset of web domains owned by relevant clinics offering stem cell-  
47 related interventions, multiple searches were undertaken in November 2016 on  
48 Google.com, with personalized results disabled. The search terms were: naturopath stem  
49 cell, acupuncturist stem cell, homeopath stem cell, chiropractor stem cell, midwife stem  
50 cell, natural stem cell, alternative stem cell, holistic stem cell, and complementary stem cell.  
51 For each search term, we attempted to identify 60 clinic websites in order of appearance;  
52 however, in some cases (e.g. for the search "complementary stem cell") the Google search  
53 results terminated before producing 60 clinic websites. Only web domains for clinics or  
54  
55  
56  
57  
58  
59  
60

1  
2  
3 practitioners with physical addresses were included as results. Supplement shops lacking a  
4 clinical component were excluded.  
5

6  
7 Once all the websites were collected, duplicates were identified and removed. Websites  
8 were shortened to their basic domain name (e.g. stemcellclinic.com/about\_us would be  
9 shortened to stemcellclinic.com), and combined into a unified dataset of 403 unique web  
10 domains. We chose in our methodology to sort the clinic web domains by coding categories,  
11 such as practitioner type, rather than by the search terms under which they appeared. This  
12 prevented miscategorization in instances where a practitioner type appeared that was  
13 different from the search term. For example, naturopath clinic websites were found in the  
14 “acupuncturist stem cell” search. Therefore, information connecting a web domain to the  
15 search term in which it occurred was discarded.  
16  
17

18  
19 A coding frame was developed using both inductive and deductive methodologies, and  
20 content analysis was then performed.[20] Coding of the websites was undertaken between  
21 February 2017 and May 2017. Initially, each web domain was manually searched to  
22 determine the country in which the clinic was located, as well as the type(s) of  
23 practitioners advertised (e.g., naturopath, midwife, medical doctor, etc). Subsequently,  
24 domain-specific Google searches were undertaken in the form of “stem cell site:URL”, to  
25 identify all mentions of stem cells in each domain. Coders then applied the coding frame to  
26 the domain by analyzing all webpages linked from the Google search results. Excerpts were  
27 copied to note examples of the statements and claims present.  
28  
29

30  
31 During coding, it became clear that several of the domains had become non-functional, had  
32 redirected to a different unrelated domain, no longer contained any mention of stem cells,  
33 or on closer analysis were not clinic websites (e.g. blogs, online stores, etc). These domains  
34 were excluded, leaving a final sample of 368 web domains to analyze.  
35

## 36 **Results**

37  
38 Of the 368 web domains, 243 marketed stem cell therapies, and 116 marketed other  
39 interventions where stem cells were mentioned in the description of the treatment or its  
40 effects (e.g. stem cells were “activated”, or “stimulated”), including platelet rich plasma  
41 injections (88), prolotherapy (19) and others (9). Many websites advertised stem cell  
42 transplantation from multiple sources, such as adipose-derived (112), bone marrow-  
43 derived (100), blood-derived (28), umbilical cord-derived (26), and others. Plant stem cell-  
44 based treatments and products (e.g. skin creams) (20) were also advertised. Tables 1 and 2  
45 summarize the types of therapies offered, and provide excerpts from selected websites as  
46 examples.  
47  
48  
49  
50  
51  
52  
53  
54  
55  
56  
57  
58  
59  
60

1  
2  
3  
4  
5  
6  
7  
8  
9  
10  
11  
12  
13  
14  
15  
16  
17  
18  
19  
20  
21  
22  
23  
24  
25  
26  
27  
28  
29  
30  
31  
32  
33  
34  
35  
36  
37  
38  
39  
40  
41  
42  
43  
44  
45  
46  
47  
48

| Therapy Type                                                           | # of Web Domains | % of Web Domains | Example (Excerpt)                                                                                                                                                                                                                                                                                                                                                                                                                                                                                                                                                                                                                                                                                                               |
|------------------------------------------------------------------------|------------------|------------------|---------------------------------------------------------------------------------------------------------------------------------------------------------------------------------------------------------------------------------------------------------------------------------------------------------------------------------------------------------------------------------------------------------------------------------------------------------------------------------------------------------------------------------------------------------------------------------------------------------------------------------------------------------------------------------------------------------------------------------|
| Adipose-Derived Autologous Stem Cell Transplantation Therapy           | 112              | 46.09            | "Adipose Derived Stem Cell (ADSC) Therapy: Adult stem cell injection is a groundbreaking treatment for orthopedic injury and other common causes of musculoskeletal pain, osteoarthritis, back or neck injury and joint pain —and, in many cases, it may be the preferred alternative to orthopedic surgery." - centerforintegratedmed.com                                                                                                                                                                                                                                                                                                                                                                                      |
| Bone Marrow-Derived Autologous Stem Cell Transplantation Therapy       | 100              | 41.15            | "My clinical practice mission is to use autologous concentrated marrow-derived mononuclear cells for the care and treatment of a joint afflicted by degenerative arthritis so as to assist a patient in postponing, perhaps avoiding a joint replacement." - sheinkopmd.com                                                                                                                                                                                                                                                                                                                                                                                                                                                     |
| Plant Stem Cell Therapies and Products                                 | 20               | 8.23             | "Gemmotherapy—made from plant stem cells, they have the ability to detoxify, nourish, and regenerate tissues in the body." - demarcohomeopathy.com                                                                                                                                                                                                                                                                                                                                                                                                                                                                                                                                                                              |
| Circulating Blood-Derived Autologous Stem Cell Transplantation Therapy | 28               | 11.52            | "We perform a large blood draw (usually about 300cc) from which we harvest stem cells. [...] Once the stem cells have multiplied, they are washed and screened again. The implantation is very simple and practically painless. The stem cells are simply injected under the skin into the lymphatic system where they can spread out in the body." - infusio.org                                                                                                                                                                                                                                                                                                                                                               |
| Umbilical Cord Blood-Derived Stem Cell Transplantation Therapy         | 26               | 10.70            | "The body's immune system is unable to recognize umbilical cord-derived mesenchymal stem cells as foreign and therefore they are not rejected. HUCT stem cells have been administered thousands of times at the Puhua Hospital and there has never been a single instance rejection (graft vs. host disease)." - puhuahospital.com                                                                                                                                                                                                                                                                                                                                                                                              |
| Other                                                                  | 35               | 14.40            | 1. "Frequently Asked Questions: Why does Dr. Gonzalez use human term placenta stem cells (HTPSCS) as opposed to umbilical cord blood, fat cells from the same sick person or cells from discarded embryos or aborted fetuses?" - integramedicalcenter.com<br>2. "Disclaimer: All American Healthcare New Orleans does not use any stem cells that originate from an embryo. All of our stem cells used in stem cell therapy and regenerative medicine originate from the amniotic sac and amniotic fluid." - neworleans.allamericanhealthcare.net<br>3. "Patients may receive between 1 to 12 injections. The amount of cells per injections varies between 5 Million to 20 Million of Embryonic Stem Cells." - a1stemcells.com |

49  
50  
51  
52  
53  
54  
55  
56  
57  
58  
59  
60

| Treatment Type       | # of Web Domains | % of Web Domains | Example (Excerpt)                                                                                                                                                            |
|----------------------|------------------|------------------|------------------------------------------------------------------------------------------------------------------------------------------------------------------------------|
| None                 | 267              | 72.55            | N/A                                                                                                                                                                          |
| Platelet Rich Plasma | 88               | 23.91            | "PRP injections result in a robust release of healing growth factors as well as attraction of autologous stem cells to regenerate the site of injury." - corewellnesspdx.com |



|              |    |      |                                                                                                                                                                                                                                                                                                                                                                                                                                                                                                                                                                                                         |
|--------------|----|------|---------------------------------------------------------------------------------------------------------------------------------------------------------------------------------------------------------------------------------------------------------------------------------------------------------------------------------------------------------------------------------------------------------------------------------------------------------------------------------------------------------------------------------------------------------------------------------------------------------|
| Prolotherapy | 19 | 5.16 | "The leading form of Prolotherapy is Platelet Rich Plasma; also known as PRP Prolotherapy. Platelets are part of our circulating blood, and they control blood clotting. Platelets also contain "Platelet Derived Growth Factors". These growth factors stimulate dormant stem cells to regrow injured or worn painful joints." - drwik.com [Note: prolotherapy and PRP are related and were often mentioned together]                                                                                                                                                                                  |
| Other        | 9  | 2.45 | "Patients who undergo oxygen therapy either sit in a hyperbaric room or a one-person hyperbaric clear, plastic tube, depending upon the illness that is being treated. In either situation, the air pressured in the chamber is increased two or three times. The increase in air pressure allows the lungs to gather more oxygen than normal, subsequently allowing the blood to carry this extra oxygen throughout the body. The increase in oxygen helps to fight bacteria and stimulates the release of growth factors and stem cells, substances that help to promote healing." - painendshare.com |

Treatment targets for stem cell treatments varied, but were most commonly pain/injury relating to the bones, joints and muscles (182), illness (diseases or maladies including autoimmune disorders, degenerative conditions, genetic disorders, infectious diseases, and environmental harms, other than chronic conditions primarily affecting on the bones, joints and muscles) (82), cosmetic concerns (52), non-cosmetic aging (44) and sexual enhancement (18). Table 3 summarizes treatment targets and provides excerpts showing examples of claims noted.

| Treatment Target Type         | # of Web Domains | % of Web Domains | Example (Excerpt)                                                                                                                                                                                                                                                                                                                     |
|-------------------------------|------------------|------------------|---------------------------------------------------------------------------------------------------------------------------------------------------------------------------------------------------------------------------------------------------------------------------------------------------------------------------------------|
| Unspecified                   | 6                | 2.47             | N/A                                                                                                                                                                                                                                                                                                                                   |
| Pain/Injury (Musculoskeletal) | 182              | 74.90            | "These treatments enhance the natural cycles of repair in chronically injured joints, ligaments and tendons. Regenerative injections are an effective treatment for all manner of acute and chronic back and neck pain, as well as osteoarthritis and injuries to the hip, knee, shoulder, elbow, wrist, foot and ankle." - myctm.org |



|                       |    |       |                                                                                                                                                                                                                                                                                                                                                                                                                                                                                                                                                                                                                                                                                                                                                                                                                                                                                                                                                                                                                                                          |
|-----------------------|----|-------|----------------------------------------------------------------------------------------------------------------------------------------------------------------------------------------------------------------------------------------------------------------------------------------------------------------------------------------------------------------------------------------------------------------------------------------------------------------------------------------------------------------------------------------------------------------------------------------------------------------------------------------------------------------------------------------------------------------------------------------------------------------------------------------------------------------------------------------------------------------------------------------------------------------------------------------------------------------------------------------------------------------------------------------------------------|
| Other Illness/Disease | 82 | 33.74 | 1. "The Lung Institute offers stem cell treatment for many major pulmonary conditions, including chronic obstructive pulmonary disease (COPD), emphysema, chronic bronchitis, pulmonary fibrosis and interstitial lung disease." - lunginstitute.com<br>2. "In Dr. Steenblock's experience the use of the patient's own bone marrow is the safest, simplest, and cheapest method to treat CHF [congestive heart failure] with stem cells and in his opinion gets consistently good or better results than those more expensive and risky methods of treatment described above." - personalized-regenerative-medicine.com<br>3. "Stem Cells - This treatment has great therapeutic potential given to the cells ability in regulating the immune system, regenerating tissues and organs and preventing pathologies." - flordelasalud.com<br>4. "Stem Cell Vaccine Therapy can be used with other surgical interventions to replace post surgical chemotherapy, or can be used as a stand alone treatment if indicated." - stemcelltreatmentinstitute.com |
| Cosmetic              | 52 | 21.40 | "The natural stem cell breast augmentations with stem cell-enriched autologous fat is an outpatient procedure performed under local anesthesia." - liposuctionthailand.org                                                                                                                                                                                                                                                                                                                                                                                                                                                                                                                                                                                                                                                                                                                                                                                                                                                                               |
| Aging                 | 44 | 18.11 | "Thai Regen offers stem cell therapy and other medical and holistic healing treatments in Thailand (Bangkok and Chiang Mai) for the prevention and treatment of degenerative disease as well as for anti-aging and body rejuvenation." - thairegen.com                                                                                                                                                                                                                                                                                                                                                                                                                                                                                                                                                                                                                                                                                                                                                                                                   |
| Sexual Enhancement    | 18 | 7.41  | "There are exciting new treatment options for men suffering from erectile dysfunction that can provide natural and lasting results without medication, including stem cell therapy." - innovativecosmeticsurgery.com                                                                                                                                                                                                                                                                                                                                                                                                                                                                                                                                                                                                                                                                                                                                                                                                                                     |
| Other                 | 7  | 2.88  | "It's a system that totally defies traditional addiction treatment. Instead of administering another addictive medicine, we use plant-based medicine, stem cells, super foods, Ibogaine and Ayahuasca as part of the system." - theholisticsanctuary.com                                                                                                                                                                                                                                                                                                                                                                                                                                                                                                                                                                                                                                                                                                                                                                                                 |

The majority of the clinics from the sample were located in the United States (see Table 4). Also, despite using CAM-focused search terms and not searching specifically for medical doctors, over half of the web domains marketing stem cell therapies featured medical doctors (130). Sixty-six (66) of the 368 websites featured medical doctors along with at least one CAM practitioner. Other common practitioner types included chiropractors (53), naturopaths (44) and acupuncturists (20). Table 5 summarizes the practitioner types noted in the results.

| Country       | Full Sample, n=368 |       | Only Clinics Offering Stem Cell Therapies, n=243 |       |
|---------------|--------------------|-------|--------------------------------------------------|-------|
|               | Totals             | %     | Totals                                           | %     |
| United States | 295                | 80.16 | 208                                              | 85.60 |

|                      |    |      |   |      |
|----------------------|----|------|---|------|
| India                | 19 | 5.16 | 8 | 3.29 |
| Canada               | 14 | 3.80 | 7 | 2.88 |
| Australia            | 8  | 2.17 | 2 | 0.82 |
| Mexico               | 7  | 1.90 | 6 | 2.47 |
| United Kingdom       | 7  | 1.90 | 1 | 0.41 |
| Thailand             | 6  | 1.63 | 4 | 1.65 |
| China                | 3  | 0.82 | 2 | 0.82 |
| Israel               | 2  | 0.54 | 0 | 0.00 |
| Denmark              | 2  | 0.54 | 2 | 0.82 |
| United Arab Emirates | 1  | 0.27 | 1 | 0.41 |
| Netherlands          | 1  | 0.27 | 1 | 0.41 |
| Serbia               | 1  | 0.27 | 1 | 0.41 |
| Lithuania            | 1  | 0.27 | 0 | 0.00 |
| Ireland              | 1  | 0.27 | 0 | 0.00 |
| Pakistan             | 1  | 0.27 | 1 | 0.41 |
| Hong Kong            | 1  | 0.27 | 1 | 0.41 |
| New Zealand          | 1  | 0.27 | 1 | 0.41 |

| Practitioner      | Full Sample, n=368 |       | Only Clinics Offering Stem Cell Therapies, n=243 |       |
|-------------------|--------------------|-------|--------------------------------------------------|-------|
|                   | Totals             | %     | Totals                                           | %     |
| Medical Doctor    | 161                | 43.75 | 130                                              | 53.50 |
| Naturopath        | 63                 | 17.12 | 44                                               | 18.11 |
| Chiropractor      | 61                 | 16.58 | 53                                               | 21.81 |
| Acupuncturist     | 36                 | 9.78  | 20                                               | 8.23  |
| Midwife           | 33                 | 8.97  | 0                                                | 0.00  |
| Homeopath         | 27                 | 7.34  | 8                                                | 3.29  |
| Massage Therapist | 13                 | 3.53  | 13                                               | 5.35  |
| Aesthetician      | 9                  | 2.45  | 7                                                | 2.88  |
| Registered Nurse  | 7                  | 1.90  | 6                                                | 2.47  |
| Ayurvedic Doctor  | 2                  | 0.54  | 1                                                | 0.41  |
| Other             | 74                 | 20.11 | 57                                               | 23.46 |
| Not Specified     | 34                 | 9.24  | 22                                               | 9.05  |

A low percentage of the domains advertising stem cell therapies stated that there was limited evidence of efficacy of the interventions (18.93%), or that there was evidence of

inefficacy (12.76%). Only some domains mentioned general risks associated with an intervention (such as the small risk of infection or allergic reaction from injecting a substance with a needle) (24.69%), and even fewer mentioned risks specific to the mode of therapy (such as the potential to cause further damage to a joint by injecting cells into it) (5.76%). A minority of domains mentioned the regulatory (e.g. FDA) status of the intervention (30.86%), and only 33.33% noted that the therapy is experimental or unproven. Hype language, defined as exaggerated or extreme language when speaking about potential benefits (e.g. breakthrough, revolutionary, cure, incredible, amazing, magical, etc.) was found on 31.69% of the web domains offering stem cell therapies. See Table 6 for greater detail on the disclosures made on the web domains, and for examples of excerpts.

**Table 6: Claims and Language Used (Among Web Domains Marketing Stem Cell Therapies, n=243)**

| Claim/Language Used                               | YES | NO  | % (YES) | % (NO) | Example (Excerpt) fulfilling "Yes" Coding Selection                                                                                                                                                                                                                                                                                                                                                                                                                                                                                                                                                                                                                                                                                                      |
|---------------------------------------------------|-----|-----|---------|--------|----------------------------------------------------------------------------------------------------------------------------------------------------------------------------------------------------------------------------------------------------------------------------------------------------------------------------------------------------------------------------------------------------------------------------------------------------------------------------------------------------------------------------------------------------------------------------------------------------------------------------------------------------------------------------------------------------------------------------------------------------------|
| States Evidence of Inefficacy                     | 31  | 212 | 12.76%  | 87.24% | "Those who undergo stem cell treatment normally have about a 15% likelihood of receiving no benefits from stem cell treatment." - regenorthoclinic.com                                                                                                                                                                                                                                                                                                                                                                                                                                                                                                                                                                                                   |
| States That There is Limited Evidence of Efficacy | 46  | 197 | 18.93%  | 81.07% | "Stem cells have the potential to cure the disease from its root; however it is not approved by FDA as proven results are not yet available." - stemgenn.com                                                                                                                                                                                                                                                                                                                                                                                                                                                                                                                                                                                             |
| States General Risks                              | 60  | 183 | 24.69%  | 75.31% | "Any time you penetrate the skin there is a small risk of infection. Our procedures are performed using strict aseptic techniques, so infection is rare, occurring in only about 1 of every 10,000 patients. Other possible complications include allergic reactions to local anesthetic and bleeding, and both are extremely rare." - dhpmcharlotte.com                                                                                                                                                                                                                                                                                                                                                                                                 |
| States Risks Specific to Mode of Therapy          | 14  | 229 | 5.76%   | 94.24% | "There are certain unavoidable risks and potential side effects and complications to the Treatments, including without limitation swelling; increased pain; bleeding; dizziness, numbness; scarring; scar or keloid formation; asymmetry; allergic reaction; discoloration; soreness, itching, a feeling of "lumpiness" or permanent skin contour irregularities at the site of Treatments;, all of which may be permanent. Treatment may very rarely cause infection; injury to nerves, temporary or permanent alteration in sensation; the need for additional surgery or hospitalization; spinal cord injuries, pneumothorax (temporary lung collapse), paralysis, or other serious or debilitating injuries or death" - mauiregenerativemedicine.com |
| States Regulatory Status                          | 75  | 168 | 30.86%  | 69.14% | "The Food and Drug Administration (FDA) has NOT approved the use of adult stem cells/SVF for any disorder. The Cell Surgical Network and its affiliate treatment centers are not offering stem cell therapy as a cure for any condition, disease, or injury. No statements or implied treatments on this website have been evaluated or approved by the FDA. This website contains no medical advice." - innovationsstemcellcenter.com                                                                                                                                                                                                                                                                                                                   |

|                                            |    |     |        |        |                                                                                                                                                                                                                                                                                                                                                                                                                                                                                                                                                                                                                                                                                                                                                                            |
|--------------------------------------------|----|-----|--------|--------|----------------------------------------------------------------------------------------------------------------------------------------------------------------------------------------------------------------------------------------------------------------------------------------------------------------------------------------------------------------------------------------------------------------------------------------------------------------------------------------------------------------------------------------------------------------------------------------------------------------------------------------------------------------------------------------------------------------------------------------------------------------------------|
| States Therapy is Experimental or Unproven | 81 | 162 | 33.33% | 66.67% | "That being said, the cutting edge stem cell therapy is still considered experimental. Stem cells are currently being studied in many arenas, and the prospect for health improvement using stem cells is great, but many results at this point have only been studying on very few patients. We perform stem cell therapy for the benefit of our patients, and are not involved in any clinical trials."<br>- drandrewlipton.com                                                                                                                                                                                                                                                                                                                                          |
| Uses Hype Language                         | 77 | 166 | 31.69% | 68.31% | 1. "Researchers have finally found the "fountain of youth" and it can regenerate your bodily processes by ridding you of all sorts of degenerative diseases and aging cells." - stemgenn.com<br>2. "A Revolution in Biologics: There is a major gap for orthopedic treatment options between conservative treatment and surgery. Platelet Rich Plasma and stem cells from Bone Marrow Concentrate offer a therapeutic treatment option." - sheinkopmd.com<br>3. - "Breakthrough Healing for Degenerative Diseases and Chronic Ailments: Are you tired of trying traditional treatment options with little to no change? Do you want to avoid costly, painful surgery? Stem cell therapy could be the answer you're looking for!"<br>- neworleans.allamericanhealthcare.net |

Intercoder reliability testing was completed for 79 of the 368 entries, or 21.47% of the sample. Kappa scores were calculated based on intercoder agreement, and are summarized in Table 7. The scores reflect substantial to perfect agreement between coders.[21]

|                                                    |        |
|----------------------------------------------------|--------|
| Practitioner                                       | 0.8665 |
| Modes of Stem Cell Therapy Offered                 | 0.9672 |
| Advertised Stem Cell Treatment Targets             | 0.9009 |
| Other Treatments Offered That Reference Stem Cells | 0.9268 |
| States Evidence of Inefficacy                      | 1.0000 |
| States That There is Limited Evidence of Efficacy  | 1.0000 |
| States General Risks                               | 1.0000 |
| States Risks Specific to Mode of Therapy           | 1.0000 |
| States Regulatory Status                           | 0.9617 |
| States Therapy is Experimental or Unproven         | 0.9660 |
| Uses Hype Language                                 | 1.0000 |

Selected examples of stem cell-related claims, sorted by practitioner type listed on the relevant web domain, are included in Table 8.

| <b>Table 8: Selected Examples of Stem Cell-Related Claims Made, by Practitioner Type Listed on Website</b> |                                                                                                                                                                                                                                                                                                                                                                                                                                                                                                                                                                                                                                                                                                                                                                                                                                               |
|------------------------------------------------------------------------------------------------------------|-----------------------------------------------------------------------------------------------------------------------------------------------------------------------------------------------------------------------------------------------------------------------------------------------------------------------------------------------------------------------------------------------------------------------------------------------------------------------------------------------------------------------------------------------------------------------------------------------------------------------------------------------------------------------------------------------------------------------------------------------------------------------------------------------------------------------------------------------|
| <b>Practitioner Type</b>                                                                                   | <b>Examples of Claims</b>                                                                                                                                                                                                                                                                                                                                                                                                                                                                                                                                                                                                                                                                                                                                                                                                                     |
| Medical Doctor                                                                                             | "When it comes to Regenerative Orthopedics, stem cells are a game changer. They make our regenerative injection techniques much more effective. Stem cell therapy is the strongest, fastest and most effective regenerative stimulus we have." -regenortho.com                                                                                                                                                                                                                                                                                                                                                                                                                                                                                                                                                                                |
| Naturopath                                                                                                 | "Our regenerative and biological treatments include Prolotherapy, Platelet Rich Plasma PRP, and Adult Stem Cell Therapies. These treatments enhance the natural cycles of repair in chronically injured joints, ligaments and tendons. Regenerative injections are an effective treatment for all manner of acute and chronic back and neck pain, as well as osteoarthritis and injuries to the hip, knee, shoulder, elbow, wrist, foot and ankle. For our patients who have been told that their only solution is surgery or a life on pain medications, the vast majority have been able to achieve drug-free, pain-free function without surgery joint replacement." -myctm.org                                                                                                                                                            |
| Acupuncturist                                                                                              | "This QiGong form has proven scientific effects of stimulating and activating adult stem cells in our bone marrow; gently elongating and improving flexibility of the spine, alleviating neck, back and joint pain." -taoistacupuncture.com                                                                                                                                                                                                                                                                                                                                                                                                                                                                                                                                                                                                   |
| Chiropractor                                                                                               | "Stem Cell Therapy: If you are suffering with chronic pain, this new breakthrough treatment could change your life! Eliminate knee pain with the industry's latest proven alternative to surgery and steroids." -activephysicalmedicine.com                                                                                                                                                                                                                                                                                                                                                                                                                                                                                                                                                                                                   |
| Homeopath                                                                                                  | "Every day, Marnie supports women in restoring health and well-being to their digestive systems using homeopathy and Plant Stem Cells so they have the energy to do the things they love." -resplendenthealing.com                                                                                                                                                                                                                                                                                                                                                                                                                                                                                                                                                                                                                            |
| Midwife                                                                                                    | "Cord blood contains magical stem cells, and the idea is that if your baby becomes ill in the future you may be able to use these cells as treatment." -katybirthcenter.com                                                                                                                                                                                                                                                                                                                                                                                                                                                                                                                                                                                                                                                                   |
| Ayurvedic Doctor                                                                                           | "Experts say, "Successful regenerative medicine centered on human cells could potentially replace a number of major molecular pharmaceuticals and medical prostheses." Heart Cardiac myocytes possess the capacity for regeneration after heart attacks. Heart tissue can also be regenerated from stem cells derived from bone marrow." -ayurvedicscience.com                                                                                                                                                                                                                                                                                                                                                                                                                                                                                |
| Aesthetician                                                                                               | "ARGAN PLANT STEM CELLS: These are the first plant stem cells with proven effectiveness for deep-seated cell protection and rejuvenation. Clinical results confirm Argan Stem Cells reduce wrinkles by 26% while tightening, toning and improving skin density." -jadeholisticspa.com                                                                                                                                                                                                                                                                                                                                                                                                                                                                                                                                                         |
| Registered Nurse                                                                                           | "Stem cells can be found in every tissue in every human body, but are especially concentrated in bone marrow, blood, and adipose(fatty) cells. Stems cells are what make regenerative therapies like PRP therapy so effective; by harvesting cells from fatty tissue in this new treatment, we can send 10,000x more stem cells into your body than PRP therapy!" -drandrewlipton.com (RN's were only featured alongside other practitioners; Andrew Lipton is an osteopath)                                                                                                                                                                                                                                                                                                                                                                  |
| Massage Therapist                                                                                          | "From Aloe Vera to L-Ascorbic Acid to Peptides and Plant Stem Cells, every ingredient in my formulas works in harmony with the skin's natural processes." -bodhiholisticspa.com                                                                                                                                                                                                                                                                                                                                                                                                                                                                                                                                                                                                                                                               |
| Other                                                                                                      | <ol style="list-style-type: none"> <li>1. (Pharmacist) "Stem Cell Worx Intraoral Spray is the world's only natural stem cell supplement in an intramural spray, and it's available at The Compounding Pharmacy of Beverly Hills today. It is designed specifically to activate your own adult stem cells naturally and provides robust immunity." -compoundingexpert.com</li> <li>2. "The marrow is rich in Mesenchymal Stem Cells, which are responsible for healing damaged tissues. The stems cells are isolated from the marrow sample and platelets are isolated from the blood sample. After preparation, these two components will be reinjected directly into the damaged area of the joint using advanced imaging guidance. This ensures the cells are delivered to the exact location of need." -louisvillebodyworks.com</li> </ol> |

## Discussion

It is concerning that the majority of the web domains advertising stem cell-related interventions did not include disclosures about scientific evidence of efficacy (or lack thereof), about general and/or specific risks associated with the intervention(s) offered, about the experimental nature of the treatments, or about their regulatory status. This finding is consistent with past research on the marketing of stem cell therapies, which has indicated similar deficiencies and potentially problematic advertising practices.[13,22-24] Failing to provide accurate and complete information may impact potential patients' ability to give informed consent to treatment, and exaggerated claims, including potentially false, misleading or deceptive promotion, may risk running afoul of marketing regulations.

It is notable to see how many CAM practitioners are offering stem cell-related interventions, or in some other way using stem cells to market their products or services. Stem cell science, research and clinical application are very specialized, and it is highly unlikely that the broad array of CAM practitioners noted in this study each have the requisite expertise to work with stem cells in a safe and effective manner.[25] In some cases, and depending on the jurisdiction, these practitioners are either unregulated, regulated less stringently than medical doctors, or have been granted self-regulation but have failed to either establish and/or enforce any clearly defined evidence-based standard of care.[26] Professional regulation – including self-regulation – of CAM providers is growing,[27,28] though there remains concern about a lack of appropriate oversight.[26] Where a particular category of CAM practitioners is professionally regulated, employing professional oversight and discipline may be one option for controlling problematic practices. However, the ability and willingness of CAM regulators to set and enforce relevant standards in this context remains to be seen. At present it seems likely that other strategies – such as the use of consumer protection and truth-in-advertising laws – may be more readily available and broadly relevant.

Despite our focus on CAM in the methodology and the presence of many CAM practitioners marketing stem cell therapies in our results, we were surprised that medical doctors were still the most common practitioner type noted. These results highlight again the critical role the medical community and its regulatory bodies, such as medical colleges, have in ensuring physicians are not engaging in unprofessional conduct with respect to their clinical or marketing practices.[8,17 ,29-31]

This study also raises the issue of “scienceploitation”.[32] “Scienceploitation” occurs when popular scientific ideas, such as stem cells, are used to take advantage of the social capital associated with them and induce consumer interest in products or services. It is a potentially harmful practice that can mislead the public and damage public trust in legitimate science. In this research, we found that 116 web domains advertised non-stem cell interventions with language that references stem cells (see Table 2 for examples), which was arguably done in order to leverage the excitement surrounding stem cell science in order to market products. The application of truth-in-advertising laws may be one way to ensure that claims made are not false or misleading in a material respect,[33] and thus do not contribute to inappropriate “scienceploitation”.



1  
2  
3  
4 Many countries around the world have laws and policies, supported by enforcement  
5 agencies, prohibiting demonstrably false or misleading marketing claims.[34] For example,  
6 In the United States, the Federal Trade Commission regulates marketing claims using the  
7 *Federal Trade Commission Act*, and prohibits “deceptive and unfair acts or practices”, that is  
8 to say those that mislead consumers and affect their “behavior or decisions about the  
9 product or service”. [35,36] Similarly, in Canada, the Competition Bureau enforces the  
10 *Competition Act* which requires that representations must not be false or misleading “in a  
11 material respect”, that is to say in a manner that could “influence the ordinary consumer to  
12 buy or use the advertised product or service”. [37,38] Although not without their challenges  
13 in terms of application and enforcement, these consumer protection and truth-in-  
14 advertising governance frameworks are certainly relevant to, and in some cases should be  
15 triggered by, the questionable claims found in this study, especially those regarding the  
16 safety, efficacy and the supposedly “revolutionary” quality of some interventions  
17 advertised.  
18  
19  
20  
21

## 22 **Limitations**

23  
24 While the study covered the majority of the most common CAM providers used in the US  
25 (excepting massage therapists which were not specifically searched for given the context of  
26 stem cells, but were nonetheless noted), [39] the search terms selected did not fully  
27 encompass the gamut of existing CAM practitioner types, omitting many less common  
28 types, including reiki providers, reflexologists, etc. Moreover, given the fact that the search  
29 was undertaken in the English language on the American version of the Google search  
30 engine, there may have been an overrepresentation of American and/or English-speaking  
31 clinics. As mentioned in the methods, the coding frame was applied only to the specific  
32 webpages on web domains where the term “stem cell” was found by Google, and not to the  
33 entirety of existing content on a given domain. It is therefore possible that broad  
34 disclaimers and other relevant information were therefore excluded. Finally, our research  
35 focus was on exploring how, and by whom, stem cells are used to market health services  
36 and interventions. Though we did not evaluate claims against peer-reviewed scientific  
37 literature and thus cannot make any definitive statements as to the accuracy of any of the  
38 marketing claims, in future research this important task could be undertaken.  
39  
40  
41  
42

## 43 **Conclusion**

44  
45 Our research indicates that clinics using stem cell language to advertise their services do so  
46 in many different forms, for many different conditions, and often without disclosing  
47 evidence, risks, or regulatory information. Many CAM practitioners are now actively  
48 involved in offering and advertising stem cell-based interventions, often alongside  
49 physicians. Professional regulation may provide one avenue of oversight and enforcement  
50 for problematic conduct, but its application will be limited to regulated health professionals  
51 and impacted considerably by the strength (and will) of the regulatory regime. The  
52 questionable nature of many of the claims we found, along with the absence of important  
53 qualifying information, suggests consumer protection and truth-in-advertising regulations  
54 are highly relevant to this market and indeed could prove very useful in constraining some  
55  
56  
57  
58  
59  
60



1  
2  
3 of the more egregious marketing practices identified. The applicability of these regulatory  
4 regimes do not depend on the professional status of those advertising the services and  
5 rather typically focus on the general impression the representation conveys to the  
6 public.[40]  
7

8  
9 The use of consumer protection and truth-in-advertising regulation to curtail misleading  
10 advertising in the private, direct-to-consumer market for stem cell interventions is an area  
11 well worth further research and consideration. Important questions will include how  
12 existing legal and policy tools could be used to regulate the claims made by clinics  
13 advertising stem cell-related interventions, and how to effectively enforce the law among  
14 clinics or individual practitioners that engage in misleading marketing practices –  
15 particularly given the cross-border nature of this market. A related issue that also bears  
16 monitoring is how the practices of clinics offering unproven stem cell interventions relate  
17 to concerns about “scienceploitation” and its potential harms. Many clinics seem to be  
18 engaging in scienceploitation, which can seriously obfuscate public discourse, mislead the  
19 public, and make it difficult to discern real science from marketing claims that merely  
20 reference scientific sounding terminology. The marketing of unproven stem cell therapies  
21 has the potential to harm patients, and to harm the reputation of stem cell science. It is  
22 incumbent upon regulators and policy makers to take a proactive approach to managing  
23 the risks associated with the growing private market for stem cell-related interventions,  
24 and addressing misleading marketing practices is an important part of this strategy.  
25  
26  
27  
28

## 29 References

- 30 1. International Society for Stem Cell Research. ISSCR 2017 Highlights New  
31 Discoveries in Stem Cell Research & Progress Toward Clinical Therapies. 25 April  
32 2017. Accessed July 14, 2017. <http://www.isscr.org/home/about-us/news-press-releases/2016/2017/04/25/isscr-2017-highlights-new-discoveries-in-stem-cell-research-progress-toward-clinical-therapies>
- 33 2. Guzzo RM, O’Sullivan MB. Human Pluripotent Stem Cells: Advances in Chondrogenic  
34 Differentiation and Articular Cartilage Regeneration. *Current Molecular Biology*  
35 *Reports*. 2016 Sep 1;2(3):113-22.
- 36 3. Caulfield T, Sipp D, Murry CE, Daley GQ, Kimmelman J. Confronting stem cell hype.  
37 *Science*. 2016 May 13;352(6287):776-7.
- 38 4. International Society for Stem Cell Research. Patient Handbook on Stem Cell  
39 Therapies. December 3, 2008. Accessed July 14, 2017.  
40 <http://www.closerlookatstemcells.org/docs/default-source/patient-resources/patient-handbook---english.pdf?sfvrsn=4>
- 41 5. A Closer Look at Stem Cells. Nine Things To Know About Stem Cell Treatments  
42 (ISSCR). 2015. Accessed July 14, 2017. <http://www.closerlookatstemcells.org/stem-cells-and-medicine/nine-things-to-know-about-stem-cell-treatments>.
- 43 6. Daley GQ. Polar Extremes in the Clinical Use of Stem Cells. *N Engl J Med*.  
44 2017;376:1075-77.
- 45 7. Deans RJ, Gunter KC, Dominici M, Forte M. Part 5: Unproven cell therapies and the  
46 commercialization of cell-based products. *Cytotherapy*. 2016 Jan 1;18(1):138-42.
- 47 8. Ikonomidou L, Freishtat RJ, Wagner DE, Panoskaltsis-Mortari A, Weiss DJ. The global  
48 emergence of unregulated stem cell treatments for respiratory diseases.  
49  
50  
51  
52  
53  
54  
55  
56  
57  
58  
59

- 1  
2  
3 Professional societies need to act. *Annals of the American Thoracic Society*, 2016;  
4 13(8): 1205-1207).
- 5  
6 9. Berger I, Ahmad A, Bansal A, et al. Global Distribution of Businesses Marketing Stem  
7 Cell-Based Interventions. *Cell Stem Cell*, 2016; 4: 158-162.
- 8  
9 10. U.S. Food & Drug Administration. Vaccines, Blood & Biologics; Cellular & Gene  
10 Therapy Products; Approved Products; Marketed Products. January 17, 2017.  
11 Accessed July 14, 2017.  
12 <https://www.fda.gov/BiologicsBloodVaccines/CellularGeneTherapyProducts/ApprovedProducts/default.htm>  
13
- 14 11. Ogbogu U, Rachul C, Caulfield T. Reassessing direct-to-consumer portrayals of  
15 unproven stem cell therapies: is it getting better? *Regenerative medicine*. 2013  
16 May;8(3):361-9.
- 17  
18 12. RegenBerg A, Hutchinson L, Schanker B, Mathews D. Medicine on the Fringe: Stem  
19 Cell-Based Interventions in Advance of Evidence. *Stem Cells*. 2009. 27, 2312-2319.
- 20  
21 13. Turner L, Knoepfler P. Selling stem cells in the USA: assessing the direct-to-  
22 consumer industry. *Cell Stem Cell*. 2016 Aug 4;19(2):154-7.
- 23  
24 14. Berger I, Ahmad A, Bansal A, et al. Global Distribution of Businesses Marketing Stem  
25 Cell-Based Interventions. *Cell Stem Cell*, 2016; 4: 158-162.
- 26  
27 15. The Cystic Fibrosis Foundation. Stem Cell Therapies and Research for Cystic  
28 Fibrosis. March 9, 2015. Accessed August 22, 2017.  
29 <https://www.cff.org/News/News-Archive/2015/Stem-Cell-Therapies-and-Research-for-Cystic-Fibrosis/>  
30
- 31 16. Rosemann A, Sleebom-Faulkner M. New regulation for clinical stem cell research in  
32 China: expected impact and challenges for implementation. *Regenerative Medicine*.  
33 2016 11(1): 5-9.
- 34  
35 17. Sipp D, Caulfield T, Kaye J, Barfoot J, Blackburn C, Chan S, De Luca M, Kent A, McCabe  
36 C, Munsie M, Sleebom-Faulkner M. Marketing of unproven stem cell-based  
37 interventions: A call to action. *Science Translational Medicine*. 2017 Jul  
38 5;9(397):eaag0426.
- 39  
40 18. Ogbogu U. Combating Unlicensed Stem Cell Interventions Through Truthful  
41 Advertising Law: A Survey of Regulatory Trends. *McGill Journal of Law and Health*.  
42 2016. 9(2): 311-335.
- 43  
44 19. Zarzeczny A, Caulfield T, Ogbogu U, et al. Professional Regulation: A Potentially  
45 Valuable Tool in Responding to “Stem Cell Tourism”. *Stem Cell Reports*. 2014. 3(3):  
46 379-384.
- 47  
48 20. Elo S, Kyngäs H. The qualitative content analysis process. *Journal of advanced  
49 nursing*. 2008 Apr 1;62(1):107-15.
- 50  
51 21. McHugh ML. Interrater reliability: the kappa statistic. *Biochemia medica*. 2012 Oct  
52 15;22(3):276-82.
- 53  
54 22. D. Lau, U. Ogbogu, B. Taylor, T. Stafinski, D. Menon, T. Caulfield, Stem cell clinics  
55 online: The direct-to- consumer portrayal of stem cell medicine. *Cell Stem Cell* 3,  
56 591–594 (2008).
- 57  
58 23. Fujita M, Hatta T, Ozeki R, Akabayashi A. The current status of clinics providing  
59 private practice cell therapy in Japan. *Regenerative medicine*. 2016 Jan;11(1):23-32.  
60

24. Regenberg AC, Hutchinson LA, Schanker B, Mathews DJ. Medicine on the fringe: stem cell-based interventions in advance of evidence. *Stem Cells*. 2009 Sep 1;27(9):2312-9.
25. Daley G. Polar Extremes in the Clinical Use of Stem Cells. *New England Journal of Medicine*. 376(11): 1075-1077.
26. C Weeks. Are we being served by the regulation of naturopaths? Not if patients are still being misled. *The Globe and Mail*. April 28 2016. Accessed July 14, 2017. <https://www.theglobeandmail.com/life/health-and-fitness/health/canadian-naturopaths-need-to-follow-the-rules-if-they-want-regulation/article29785140/>
27. Gilmour J, Kelner M, Wellman B. Opening the door to Complementary and Alternative Medicine: Self-Regulation in Ontario. *Law and Policy*. 2002. 24(2): 149-174.
28. Welsh S, et al. Moving forward? Complementary and alternative practitioners seeking self-regulation. *Sociology of Health & Illness*. 2004. 26(2): 216-241.
29. Medical Board of California (MBC). (2007). In the Matter of the Accusation against Darryl Matthew See, M.D. Division of Medical Quality, Medical Board of California, Department of Consumer Affairs, State of California. Case No. 04-2004-161179. <http://www.casewatch.org/board/med/see/surrender.pdf>.
30. SMC (Singapore Medical Council). Disciplinary Inquiry for Dr. Wong Yoke Meng. November 3, 2010. [http://www.healthprofessionals.gov.sg/content/dam/hprof/smc/docs/press\\_releases/14.Press%20Release\\_Dr%20Wong%20Yoke%20Meng\\_3Nov10.pdf](http://www.healthprofessionals.gov.sg/content/dam/hprof/smc/docs/press_releases/14.Press%20Release_Dr%20Wong%20Yoke%20Meng_3Nov10.pdf)
31. SMC (Singapore Medical Council). Press Release: Disciplinary inquiry for Dr. Wong Yoke Meng. November 9, 2010. [http://www.healthprofessionals.gov.sg/content/dam/hprof/smc/docs/press\\_releases/15.Press%20Release\\_Dr%20Wong%20Yoke%20Meng4\\_9Nov10.pdf](http://www.healthprofessionals.gov.sg/content/dam/hprof/smc/docs/press_releases/15.Press%20Release_Dr%20Wong%20Yoke%20Meng4_9Nov10.pdf).
32. Caulfield T. Blinded by Science: Modern-day hucksters are cashing in on vulnerable patients. *The Walrus*, Sept. 12, 2011. Accessed July 19, 2017. <https://thewalrus.ca/blinded-by-science/>
33. Competition Act, R.S.C. 1985, c. C-34, s. 74.01(1)(a).
34. Ogbogu U. Combating Unlicensed Stem Cell Interventions Through Truthful Advertising Law: A Survey of Regulatory Trends. *McGill Journal of Law and Health*. 2016. 9(2): 27 pages.
35. Federal Trade Commission. (2000) Advertising and Marketing on the Internet: Rules of the Road. Accessed July 14, 2017. <https://www.ftc.gov/tips-advice/business-center/guidance/advertising-marketing-internet-rules-road>
36. Federal Trade Commission. (2016) Federal Trade Commission Act Sect 5: Unfair or Deceptive Acts or Practices. (<https://www.federalreserve.gov/boarddocs/supmanual/cch/ftca.pdf>)
37. Competition Act, RSC 1985, c C-34
38. Competition Bureau, "False and Misleading Representations and Deceptive Marketing Practices under the Competition Act" (3 November 2011), online: <http://www.competitionbureau.gc.ca/eic/site/cb-bc.nsf/eng/03133.html>
39. Barnes PM, Bloom B, Nahin R. CDC National Health Statistics Report #12. Complementary and Alternative Medicine Use Among Adults and Children: United States, 2007. December 10, 2008.

1  
2  
3  
4  
5  
6  
7  
8  
9  
10  
11  
12  
13  
14  
15  
16  
17  
18  
19  
20  
21  
22  
23  
24  
25  
26  
27  
28  
29  
30  
31  
32  
33  
34  
35  
36  
37  
38  
39  
40  
41  
42  
43  
44  
45  
46  
47  
48  
49  
50  
51  
52  
53  
54  
55  
56  
57  
58  
59  
60

40. Competition Bureau. False or Misleading Representations and Deceptive Marketing Practices. <http://www.competitionbureau.gc.ca/eic/site/cb-bc.nsf/eng/03133.html>.

For peer review only

1 STROBE Statement—Checklist of items that should be included in reports of *cross-sectional studies*

|                                                   | <b>Item No</b> | <b>Recommendation</b>                                                                                                                                                                                                                                                                                                                      |
|---------------------------------------------------|----------------|--------------------------------------------------------------------------------------------------------------------------------------------------------------------------------------------------------------------------------------------------------------------------------------------------------------------------------------------|
| <b>Title and abstract</b>                         | 1              | <b>P.1 (a)</b> Indicate the study's design with a commonly used term in the title or the abstract                                                                                                                                                                                                                                          |
|                                                   |                | <b>P.1 (b)</b> Provide in the abstract an informative and balanced summary of what was done and what was found                                                                                                                                                                                                                             |
| <b>Introduction</b>                               |                |                                                                                                                                                                                                                                                                                                                                            |
| Background/rationale                              | 2              | <b>P.2-3</b> Explain the scientific background and rationale for the investigation being reported                                                                                                                                                                                                                                          |
| Objectives                                        | 3              | <b>P.3</b> State specific objectives, including any prespecified hypotheses                                                                                                                                                                                                                                                                |
| <b>Methods</b>                                    |                |                                                                                                                                                                                                                                                                                                                                            |
| Study design                                      | 4              | <b>P.3-4</b> Present key elements of study design early in the paper                                                                                                                                                                                                                                                                       |
| Setting                                           | 5              | <b>P.3-4</b> Describe the setting, locations, and relevant dates, including periods of recruitment, exposure, follow-up, and data collection                                                                                                                                                                                               |
| Participants                                      | 6              | <b>N/A (a)</b> Give the eligibility criteria, and the sources and methods of selection of participants                                                                                                                                                                                                                                     |
| Variables                                         | 7              | <b>P.3-4</b> Clearly define all outcomes, exposures, predictors, potential confounders, and effect modifiers. Give diagnostic criteria, if applicable                                                                                                                                                                                      |
| Data sources/ measurement                         | 8*             | <b>P.3-4</b> For each variable of interest, give sources of data and details of methods of assessment (measurement). Describe comparability of assessment methods if there is more than one group                                                                                                                                          |
| Bias                                              | 9              | <b>P.4</b> Describe any efforts to address potential sources of bias                                                                                                                                                                                                                                                                       |
| Study size                                        | 10             | <b>P.3-4</b> Explain how the study size was arrived at                                                                                                                                                                                                                                                                                     |
| Quantitative variables                            | 11             | <b>N/A</b> Explain how quantitative variables were handled in the analyses. If applicable, describe which groupings were chosen and why                                                                                                                                                                                                    |
| Statistical methods <b>N/A</b><br>(Kappa on P.10) | 12             | (a) Describe all statistical methods, including those used to control for confounding<br>(b) Describe any methods used to examine subgroups and interactions<br>(c) Explain how missing data were addressed<br>(d) If applicable, describe analytical methods taking account of sampling strategy<br>(e) Describe any sensitivity analyses |
| <b>Results</b>                                    |                |                                                                                                                                                                                                                                                                                                                                            |
| Participants <b>N/A</b>                           | 13*            | (a) Report numbers of individuals at each stage of study—eg numbers potentially eligible, examined for eligibility, confirmed eligible, included in the study, completing follow-up, and analysed<br>(b) Give reasons for non-participation at each stage<br>(c) Consider use of a flow diagram                                            |
| Descriptive data <b>N/A</b>                       | 14*            | (a) Give characteristics of study participants (eg demographic, clinical, social) and information on exposures and potential confounders<br>(b) Indicate number of participants with missing data for each variable of interest                                                                                                            |
| Outcome data <b>P.4-11</b>                        | 15*            | Report numbers of outcome events or summary measures                                                                                                                                                                                                                                                                                       |
| Main results <b>N/A</b>                           | 16             | (a) Give unadjusted estimates and, if applicable, confounder-adjusted estimates and their precision (eg, 95% confidence interval). Make clear which confounders were adjusted for and why they were included                                                                                                                               |

|                          |    |                                                                                                                                                                            |
|--------------------------|----|----------------------------------------------------------------------------------------------------------------------------------------------------------------------------|
|                          |    | (b) Report category boundaries when continuous variables were categorized                                                                                                  |
|                          |    | (c) If relevant, consider translating estimates of relative risk into absolute risk for a meaningful time period                                                           |
| Other analyses P.6       | 17 | Report other analyses done—eg analyses of subgroups and interactions, and sensitivity analyses                                                                             |
| <b>Discussion</b>        |    |                                                                                                                                                                            |
| Key results P.12         | 18 | Summarise key results with reference to study objectives                                                                                                                   |
| Limitations P.13         | 19 | Discuss limitations of the study, taking into account sources of potential bias or imprecision. Discuss both direction and magnitude of any potential bias                 |
| Interpretation P.12-13   | 20 | Give a cautious overall interpretation of results considering objectives, limitations, multiplicity of analyses, results from similar studies, and other relevant evidence |
| Generalisability P.12-14 | 21 | Discuss the generalisability (external validity) of the study results                                                                                                      |
| <b>Other information</b> |    |                                                                                                                                                                            |
| Funding P.2              | 22 | Give the source of funding and the role of the funders for the present study and, if applicable, for the original study on which the present article is based              |

\*Give information separately for exposed and unexposed groups.

**Note:** An Explanation and Elaboration article discusses each checklist item and gives methodological background and published examples of transparent reporting. The STROBE checklist is best used in conjunction with this article (freely available on the Web sites of PLoS Medicine at <http://www.plosmedicine.org/>, Annals of Internal Medicine at <http://www.annals.org/>, and Epidemiology at <http://www.epidem.com/>). Information on the STROBE Initiative is available at [www.strobe-statement.org](http://www.strobe-statement.org).

# BMJ Open

## Exploiting science? A systematic analysis of complementary and alternative medicine clinic websites' marketing of stem cell therapies

|                                    |                                                                                                                                                                                                                                                                |
|------------------------------------|----------------------------------------------------------------------------------------------------------------------------------------------------------------------------------------------------------------------------------------------------------------|
| Journal:                           | <i>BMJ Open</i>                                                                                                                                                                                                                                                |
| Manuscript ID                      | bmjopen-2017-019414.R1                                                                                                                                                                                                                                         |
| Article Type:                      | Research                                                                                                                                                                                                                                                       |
| Date Submitted by the Author:      | 27-Nov-2017                                                                                                                                                                                                                                                    |
| Complete List of Authors:          | Murdoch, Blake; University of Alberta, Health Law Institute, Faculty of Law<br>Zarzeczny, Amy; University of Regina, Johnson Shoyama Graduate School<br>of Public Policy<br>Caulfield, Timothy; University of Alberta, Health Law Institute, Faculty of<br>Law |
| <b>Primary Subject<br>Heading</b>: | Complementary medicine                                                                                                                                                                                                                                         |
| Secondary Subject Heading:         | Rehabilitation medicine, Communication                                                                                                                                                                                                                         |
| Keywords:                          | Stem Cells, COMPLEMENTARY MEDICINE, Marketing                                                                                                                                                                                                                  |
|                                    |                                                                                                                                                                                                                                                                |

SCHOLARONE™  
Manuscripts



## Exploiting science? A systematic analysis of complementary and alternative medicine clinic websites' marketing of stem cell therapies

Blake Murdoch<sup>i</sup>, Amy Zarzeczny<sup>ii</sup> and Timothy Caulfield<sup>iii</sup>

<sup>i</sup> Health Law Institute, Faculty of Law, University of Alberta, Edmonton, Alberta, Canada

<sup>ii</sup> Johnson Shoyama Graduate School of Public Policy, University of Regina, Regina, Saskatchewan, Canada

<sup>iii</sup> Health Law Institute, Faculty of Law; Law Centre, University of Alberta, 91 University Campus NW, Edmonton, Alberta T6G 2H5; 780-492-9575; caulfield@ualberta.ca

### Abstract

**Objective:** To identify the frequency and qualitative characteristics of stem cell-related marketing claims made on websites of clinics featuring common types of complementary and alternative medicine practitioners. The involvement of complementary and alternative medicine practitioners in the marketing of stem cell therapies and stem cell-related interventions is understudied. This research explores the extent to which they are involved and collaborate with medical professionals. This knowledge will help with identifying and evaluating potential policy responses to this growing market.

**Design:** Systematic website analysis.

**Setting:** Global. United States and English language bias due to methodology.

**Main outcome measures:** Representations made on clinic websites in relation to: practitioner types, stem cell therapies and their targets, stem cell-related interventions. Statements about stem cell therapies relating to: evidence of inefficacy, limited evidence of efficacy, general procedural risks, risks specific to the mode of therapy, regulatory status, experimental or unproven nature of therapy. Use of hype language (e.g., language that exaggerates potential benefits).

**Results:** 243 websites offered stem cell therapies. Many websites advertised stem cell transplantation from multiple sources, such as adipose-derived (112), bone marrow-derived (100), blood-derived (28), umbilical cord-derived (26), and others. Plant stem cell-based treatments and products (20) were also advertised. Purposes for and targets of treatment included pain, physical injury, a wide range of diseases and illnesses, cosmetic concerns, non-cosmetic aging, sexual enhancement, and others. Medical doctors (130), chiropractors (53) and naturopaths (44) commonly work in the clinics we found to be offering stem cell therapies. Few clinic websites advertising stem cell therapies included important additional information, including: statements about evidence of inefficacy (present on only 12.76% of websites), statements about limited evidence of efficacy (18.93%), statements of general risks (24.69%), statements of risks specific to the mode(s) of therapy (5.76%), statements as to the regulatory status of the therapies (30.86%), and statements that the therapy is experimental or unproven (33.33%). Hype language was noted (31.69%).

**Conclusions:** Stem cell therapies and related interventions are marketed for a wide breadth of conditions, and are being offered by complementary and alternative practitioners, often in conjunction with medical doctors. Consumer protection and truth-in-

1  
2  
3 advertising regulation could play important roles in addressing misleading marketing  
4 practices in this area.  
5

### 6 **Strengths and Limitations of This Study**

- 7 • The involvement of complementary and alternative medicine practitioners in the  
8 marketing of stem cell therapies and stem cell-related interventions is  
9 understudied, and this research helps us understand the extent to which they are  
10 involved, and also the extent to which they collaborate with medical professionals.
- 11 • The methodology was designed in such a way that human error was minimized;  
12 manual searching of websites was largely replaced by automated domain searches  
13 by Google, which helped coders to achieve near perfect agreement in Cohen's Kappa  
14 reliability testing.
- 15 • The search terms selected did not fully encompass the gamut of existing  
16 complementary and alternative medicine practitioner types, omitting some less  
17 common types such as reiki providers, reflexologists, etc.
- 18 • Because the coding frame was applied solely to the specific webpages on web  
19 domains where the term "stem cell" was found by Google, and not to the entirety of  
20 existing content on a given domain, it is possible that broad disclaimers and other  
21 relevant information were excluded.  
22  
23  
24  
25

### 26 **Funding Statement**

27 This work was supported by the Stem Cell Network, grant number FY17/PP1 RES0032389,  
28 and the Trudeau Foundation, grant number RES0019335.  
29  
30

### 31 **Competing Interests Statement**

32 The authors declare no competing interests.  
33  
34

### 35 **Data Sharing Statement**

36 Original dataset and time-stamped screenshots of all example statements found in the  
37 tables are available upon request to the corresponding author.  
38  
39

### 40 **Acknowledgments**

41 The authors would like to thank Robyn Hyde-Lay for her advice and guidance, and for her  
42 aid in developing applications to secure funding for this project. The authors would also  
43 like to thank research assistants Daniel Downie, Yassine El Balhouli and Corinna Liu for  
44 their help with data collection.  
45  
46

### 47 **Author Contribution Statement**

48 Murdoch, Zarzeczny and Caulfield designed the study, analyzed the data and wrote the  
49 manuscript.  
50

### 51 **Introduction**

52  
53  
54 Stem cell research has considerable clinical potential and scientific discoveries continue to  
55 advance our knowledge in this field.[1,2] Yet, despite enthusiastic media coverage of the  
56  
57  
58  
59

1  
2  
3 field,[3] only a few stem cell-based therapies are currently ready for clinical application.[4-  
4 6] This reality has not stopped the proliferation of clinics around the world advertising a  
5 wide array of unproven stem cell-based interventions.[7-9] Many of these clinics use a  
6 direct-to-consumer marketing system based on an online presence. [10,11] While much of  
7 the early growth in the commercial market for unproven stem cell-based interventions  
8 occurred in Asia,[12] it is currently spreading to jurisdictions throughout the world.[13,14]  
9 Furthermore, complementary and alternative medicine [CAM] practitioners have begun to  
10 offer stem cell-based interventions, marking a further expansion of this market.  
11  
12

13  
14 Many of these interventions are marketed despite lack of approval by relevant regulatory  
15 bodies like the U.S Food and Drug Administration's [FDA's] Center for Biologics Evaluation  
16 and Research.[10] The market also continues to flourish despite denunciation by research  
17 bodies like the International Society of Stem Cell Research,[5] cautions issued by  
18 professional societies,[15] and legislative attempts to constrain it,[16] among other efforts.  
19 The apparent resilience of this market suggests regulators and policymakers need to  
20 explore diverse approaches for addressing the various concerns associated with it.[17]  
21  
22

23 While there are services that seek to encourage websites to provide accurate health  
24 information [18], the continued proliferation of misleading marketing highlights the need  
25 for additional steps [17]. Consumer protection and truth-in-advertising laws have been  
26 proposed as potentially useful avenues of response,[19] as has greater use of professional  
27 discipline to govern the conduct of providers who are members of regulated health  
28 professions, with a particular focus on physicians.[20] In order to evaluate the potential  
29 utility of these and other related strategies, it is important to understand, first, what kinds  
30 of healthcare providers (beyond physicians) are purportedly providing these unproven  
31 interventions, and second, how these services are being marketed to the public (i.e. are the  
32 claims being made potentially inaccurate or misleading?). Identifying the professional  
33 status of those involved in the marketing of unproven stem cell-based interventions is  
34 necessary for ascertaining whether or not they are subject to professional regulation, and if  
35 so, what relevant rules govern their conduct in this field. At the same time, gathering data  
36 on the specific nature of the claims being made will highlight where existing consumer  
37 protection and truth-in-advertising laws may be triggered.  
38  
39  
40  
41

42 The ways in which CAM practitioners (as well as interdisciplinary clinics featuring CAM  
43 practitioners) use stem cells to market their services and the nature of the claims they are  
44 making have not been studied. Given the trend of CAM practitioners framing themselves as  
45 primary care providers,[21,22] and their tendencies to offer unproven interventions,[23]  
46 we hypothesized that such practitioners have begun to offer unproven stem cell therapies,  
47 and that they might make potentially misleading marketing claims about them. This raises  
48 potential safety concerns – particularly if the practitioner is not adequately trained in the  
49 relevant procedure. In addition, marketing of this kind raises the issue of  
50 “scienceploitation”.[24] “Scienceploitation” occurs when popular scientific ideas, such as  
51 stem cells, are used to take advantage of the social capital associated with them and induce  
52 consumer interest in products or services. It is a potentially harmful practice that can  
53 mislead the public and damage public trust in legitimate science. “Scienceploitation” is  
54  
55  
56  
57  
58  
59  
60

1  
2  
3 related to but distinct from hype, as the former goes beyond mere exaggeration and creates  
4 misunderstandings and/or posits false connections.  
5

6  
7 Improving understanding about CAM involvement in the private stem cell market will  
8 support identification and evaluation of available policy options in this field, and will also  
9 contribute to broader considerations of issues associated with the marketing of CAM  
10 products and services in general. Accordingly, the goal of this research was to identify CAM  
11 providers advertising stem cell-related interventions via publicly accessible websites, and  
12 then to map the types of claims being made about those interventions. We first sought to  
13 identify relevant clinic websites using search terms focused on CAM practitioner types (e.g.  
14 “naturopaths”) and common CAM terminology (e.g. “holistic”), and then to analyze the  
15 information presented on those clinic websites about stem cells and stem cell-related  
16 therapies.  
17  
18

## 19 **Methods**

20  
21  
22 In order to establish a dataset of web domains owned by relevant clinics offering stem cell-  
23 related interventions, multiple searches were undertaken in November 2016 on  
24 Google.com, with personalized results disabled. The search terms were: naturopath stem  
25 cell, acupuncturist stem cell, homeopath stem cell, chiropractor stem cell, midwife stem  
26 cell, natural stem cell, alternative stem cell, holistic stem cell, and complementary stem cell.  
27 For each search term, we attempted to identify 60 clinic websites in order of appearance;  
28 however, in some cases (e.g. for the search “complementary stem cell”) the Google search  
29 results terminated before producing 60 clinic websites. Only web domains for clinics or  
30 practitioners with physical addresses were included as results. Supplement shops lacking a  
31 clinical component were excluded.  
32  
33

34  
35 Once all the websites were collected, duplicates were identified and removed. Websites  
36 were shortened to their basic domain name (e.g. stemcellclinic.com/about\_us would be  
37 shortened to stemcellclinic.com), and combined into a unified dataset of 403 unique web  
38 domains. We chose in our methodology to sort the clinic web domains by coding categories,  
39 such as practitioner type, rather than by the search terms under which they appeared. This  
40 prevented miscategorization in instances where a practitioner type appeared that was  
41 different from the search term. For example, naturopath clinic websites were found in the  
42 “acupuncturist stem cell” search. Therefore, information connecting a web domain to the  
43 search term in which it occurred was discarded.  
44  
45

46  
47 A coding frame – that is, a framework for analyzing specific language content on the  
48 websites and converting it to numerical data for analysis – was developed using both  
49 inductive and deductive methodologies, and content analysis was then performed.[25] The  
50 coding frame is summarized in Text Box 1. Coding of the websites was undertaken between  
51 February 2017 and May 2017. Initially, each web domain was manually searched to  
52 determine the country in which the clinic was located, as well as the type(s) of  
53 practitioners advertised (e.g., naturopath, midwife, medical doctor, etc). Subsequently,  
54 domain-specific Google searches were undertaken in the form of “stem cell site:URL”, to  
55 identify all mentions of stem cells in each domain. Coders then applied the coding frame to  
56  
57  
58  
59

the domain by analyzing all webpages linked from the Google search results. Excerpts were copied to note examples of the statements and claims present.

During coding, it became clear that several of the domains had become non-functional, had redirected to a different unrelated domain, no longer contained any mention of stem cells, or on closer analysis were not clinic websites (e.g. blogs, online stores, etc). These domains were excluded, leaving a final sample of 368 web domains to analyze.

#### **Text Box 1 - Coding Frame Summary**

1. In what country is the physical address listed on the clinic website located?
2. What practitioner types are listed as clinic staff on the web domain? Choose all that apply. (see Table 5 for coding categories)
3. What types of stem cell therapies or products, as defined by the claimed source of the stem cells and their mode of usage, are marketed? Choose all that apply. (see Table 4 for coding categories)
4. What categories of conditions are targeted by the therapies advertised? Choose all that apply. (see Table 3 for coding categories) Notes on coding categories:
  - The “Other Illness/Disease” category is defined as diseases or maladies including autoimmune disorders, degenerative conditions, genetic disorders, infectious diseases, and environmental harms, other than chronic conditions primarily affecting on the bones, joints and muscles
  - The “Aging” category includes issues related to aging that are not cosmetic or aesthetic. This clearly distinguishes it from the “Cosmetic” category
5. What other treatments mentioning stem cells but not actually consisting of using them are marketed? Choose all that apply. (see Table 2 for coding categories)
6. Are there any statements relating to the stem cell therapy or therapies indicating there is evidence of inefficacy?
7. Are there any statements relating to the stem cell therapy or therapies indicating there is limited evidence of efficacy?
8. Are there any statements relating to the stem cell therapy or therapies indicating the general risks of the procedure? (e.g. minor risk of infection from injection, minor risk of allergic response, side effects of pain or soreness, etc.)
9. Are there any statements relating to the stem cell therapy or therapies indicating the risks specific to the mode of therapy? (e.g., worsening joint pain or joint malfunction caused by the injection of stem cells, unintended growth of different tissue, etc.)
10. Are there any statements relating to the stem cell therapy or therapies indicating regulatory status (e.g. FDA approved or not, etc).
11. Are there any statements relating to the stem cell therapy or therapies indicating that the therapy is experimental or unproven?
12. Are there any statements relating to the stem cell therapy or therapies that use hype language? This is defined as exaggerated or extreme language when speaking about potential benefits, e.g. breakthrough, revolution/revolutionary, cure, incredible, amazing, magical, etc.

## **Results**

Of the 368 web domains, 243 marketed stem cell therapies, and 116 marketed other interventions where stem cells were mentioned in the description of the treatment or its effects (e.g. stem cells were “activated”, or “stimulated”), including platelet rich plasma injections (88), prolotherapy (19) and others (9). Many websites advertised stem cell transplantation from multiple sources, such as adipose-derived (112), bone marrow-



derived (100), blood-derived (28), umbilical cord-derived (26), and others. Plant stem cell-based treatments and products (e.g. skin creams) (20) were also advertised. Tables 1 and 2 summarize the types of therapies offered, and provide excerpts from selected websites as examples.

**Table 1: Modes of Stem Cell Therapy Offered (Among Web Domains Marketing Stem Cell Therapies, n=243)**

| Therapy Type                                                           | # of Web Domains | % of Web Domains | Example (Excerpt)                                                                                                                                                                                                                                                                                                                                                 |
|------------------------------------------------------------------------|------------------|------------------|-------------------------------------------------------------------------------------------------------------------------------------------------------------------------------------------------------------------------------------------------------------------------------------------------------------------------------------------------------------------|
| Adipose-Derived Autologous Stem Cell Transplantation Therapy           | 112              | 46.09            | "Adipose Derived Stem Cell (ADSC) Therapy: Adult stem cell injection is a groundbreaking treatment for orthopedic injury and other common causes of musculoskeletal pain, osteoarthritis, back or neck injury and joint pain —and, in many cases, it may be the preferred alternative to orthopedic surgery." - centerforintegratedmed.com                        |
| Bone Marrow-Derived Autologous Stem Cell Transplantation Therapy       | 100              | 41.15            | "My clinical practice mission is to use autologous concentrated marrow-derived mononuclear cells for the care and treatment of a joint afflicted by degenerative arthritis so as to assist a patient in postponing, perhaps avoiding a joint replacement." - sheinkopmd.com                                                                                       |
| Plant Stem Cell Therapies and Products                                 | 20               | 8.23             | "Gemmotherapy—made from plant stem cells, they have the ability to detoxify, nourish, and regenerate tissues in the body." - demarcohomeopathy.com                                                                                                                                                                                                                |
| Circulating Blood-Derived Autologous Stem Cell Transplantation Therapy | 28               | 11.52            | "We perform a large blood draw (usually about 300cc) from which we harvest stem cells. [...] Once the stem cells have multiplied, they are washed and screened again. The implantation is very simple and practically painless. The stem cells are simply injected under the skin into the lymphatic system where they can spread out in the body." - infusio.org |
| Umbilical Cord Blood-Derived Stem Cell Transplantation Therapy         | 26               | 10.70            | "The body's immune system is unable to recognize umbilical cord-derived mesenchymal stem cells as foreign and therefore they are not rejected. HUCT stem cells have been administered thousands of times at the Puhua Hospital and there has never been a single instance rejection (graft vs. host disease)." - puhuahospital.com                                |

|       |    |       |                                                                                                                                                                                                                                                                                                                                                                                                                                                                                                                                                                                                                                                                                                                                                        |
|-------|----|-------|--------------------------------------------------------------------------------------------------------------------------------------------------------------------------------------------------------------------------------------------------------------------------------------------------------------------------------------------------------------------------------------------------------------------------------------------------------------------------------------------------------------------------------------------------------------------------------------------------------------------------------------------------------------------------------------------------------------------------------------------------------|
| Other | 35 | 14.40 | <p>1. "Frequently Asked Questions: Why does Dr. Gonzalez use human term placenta stem cells (HTPSCS) as opposed to umbilical cord blood, fat cells from the same sick person or cells from discarded embryos or aborted fetuses?"<br/>- integramedicalcenter.com</p> <p>2. "Disclaimer: All American Healthcare New Orleans does not use any stem cells that originate from an embryo. All of our stem cells used in stem cell therapy and regenerative medicine originate from the amniotic sac and amniotic fluid."<br/>- neworleans.allamericanhealthcare.net</p> <p>3. "Patients may receive between 1 to 12 injections. The amount of cells per injections varies between 5 Million to 20 Million of Embryonic Stem Cells." - a1stemcells.com</p> |
|-------|----|-------|--------------------------------------------------------------------------------------------------------------------------------------------------------------------------------------------------------------------------------------------------------------------------------------------------------------------------------------------------------------------------------------------------------------------------------------------------------------------------------------------------------------------------------------------------------------------------------------------------------------------------------------------------------------------------------------------------------------------------------------------------------|

**Table 2: Other Treatments Offered That Reference Stem Cells (Among All Web Domains, n=368)**

| Treatment Type       | # of Web Domains | % of Web Domains | Example (Excerpt)                                                                                                                                                                                                                                                                                                                                                                                                                                                                                                                                                                                       |
|----------------------|------------------|------------------|---------------------------------------------------------------------------------------------------------------------------------------------------------------------------------------------------------------------------------------------------------------------------------------------------------------------------------------------------------------------------------------------------------------------------------------------------------------------------------------------------------------------------------------------------------------------------------------------------------|
| None                 | 267              | 72.55            | N/A                                                                                                                                                                                                                                                                                                                                                                                                                                                                                                                                                                                                     |
| Platelet Rich Plasma | 88               | 23.91            | "PRP injections result in a robust release of healing growth factors as well as attraction of autologous stem cells to regenerate the site of injury." - corewellnesspdx.com                                                                                                                                                                                                                                                                                                                                                                                                                            |
| Prolotherapy         | 19               | 5.16             | "The leading form of Prolotherapy is Platelet Rich Plasma; also known as PRP Prolotherapy. Platelets are part of our circulating blood, and they control blood clotting. Platelets also contain "Platelet Derived Growth Factors". These growth factors stimulate dormant stem cells to regrow injured or worn painful joints." - drwik.com [Note: prolotherapy and PRP are related and were often mentioned together]                                                                                                                                                                                  |
| Other                | 9                | 2.45             | "Patients who undergo oxygen therapy either sit in a hyperbaric room or a one-person hyperbaric clear, plastic tube, depending upon the illness that is being treated. In either situation, the air pressured in the chamber is increased two or three times. The increase in air pressure allows the lungs to gather more oxygen than normal, subsequently allowing the blood to carry this extra oxygen throughout the body. The increase in oxygen helps to fight bacteria and stimulates the release of growth factors and stem cells, substances that help to promote healing." - painendshere.com |

Treatment targets for stem cell treatments varied, but were most commonly pain/injury relating to the bones, joints and muscles (182), illness (diseases or maladies including autoimmune disorders, degenerative conditions, genetic disorders, infectious diseases, and environmental harms, other than chronic conditions primarily affecting on the bones, joints and muscles) (82), cosmetic concerns (52), non-cosmetic aging (44) and sexual enhancement (18). Table 3 summarizes treatment targets and provides excerpts showing examples of claims noted.

**Table 3: Advertised Stem Cell Treatment Targets (Among Web Domains Marketing Stem Cell Therapies, n=243)**



| Treatment Target Type         | # of Web Domains | % of Web Domains | Example (Excerpt)                                                                                                                                                                                                                                                                                                                                                                                                                                                                                                                                                                                                                                                                                                                                                                                                                                                                                                                                                                                                                                        |
|-------------------------------|------------------|------------------|----------------------------------------------------------------------------------------------------------------------------------------------------------------------------------------------------------------------------------------------------------------------------------------------------------------------------------------------------------------------------------------------------------------------------------------------------------------------------------------------------------------------------------------------------------------------------------------------------------------------------------------------------------------------------------------------------------------------------------------------------------------------------------------------------------------------------------------------------------------------------------------------------------------------------------------------------------------------------------------------------------------------------------------------------------|
| Unspecified                   | 6                | 2.47             | N/A                                                                                                                                                                                                                                                                                                                                                                                                                                                                                                                                                                                                                                                                                                                                                                                                                                                                                                                                                                                                                                                      |
| Pain/Injury (Musculoskeletal) | 182              | 74.90            | "These treatments enhance the natural cycles of repair in chronically injured joints, ligaments and tendons. Regenerative injections are an effective treatment for all manner of acute and chronic back and neck pain, as well as osteoarthritis and injuries to the hip, knee, shoulder, elbow, wrist, foot and ankle." - myctm.org                                                                                                                                                                                                                                                                                                                                                                                                                                                                                                                                                                                                                                                                                                                    |
| Other Illness/Disease         | 82               | 33.74            | 1. "The Lung Institute offers stem cell treatment for many major pulmonary conditions, including chronic obstructive pulmonary disease (COPD), emphysema, chronic bronchitis, pulmonary fibrosis and interstitial lung disease." - lunginstitute.com<br>2. "In Dr. Steenblock's experience the use of the patient's own bone marrow is the safest, simplest, and cheapest method to treat CHF [congestive heart failure] with stem cells and in his opinion gets consistently good or better results than those more expensive and risky methods of treatment described above." - personalized-regenerative-medicine.com<br>3. "Stem Cells - This treatment has great therapeutic potential given to the cells ability in regulating the immune system, regenerating tissues and organs and preventing pathologies." - flordelasalud.com<br>4. "Stem Cell Vaccine Therapy can be used with other surgical interventions to replace post surgical chemotherapy, or can be used as a stand alone treatment if indicated." - stemcelltreatmentinstitute.com |
| Cosmetic                      | 52               | 21.40            | "The natural stem cell breast augmentations with stem cell-enriched autologous fat is an outpatient procedure performed under local anesthesia." - liposuctionthailand.org                                                                                                                                                                                                                                                                                                                                                                                                                                                                                                                                                                                                                                                                                                                                                                                                                                                                               |
| Aging                         | 44               | 18.11            | "Thai Regen offers stem cell therapy and other medical and holistic healing treatments in Thailand (Bangkok and Chiang Mai) for the prevention and treatment of degenerative disease as well as for anti-aging and body rejuvenation." - thairegen.com                                                                                                                                                                                                                                                                                                                                                                                                                                                                                                                                                                                                                                                                                                                                                                                                   |
| Sexual Enhancement            | 18               | 7.41             | "There are exciting new treatment options for men suffering from erectile dysfunction that can provide natural and lasting results without medication, including stem cell therapy." - innovativecosmeticsurgery.com                                                                                                                                                                                                                                                                                                                                                                                                                                                                                                                                                                                                                                                                                                                                                                                                                                     |
| Other                         | 7                | 2.88             | "It's a system that totally defies traditional addiction treatment. Instead of administering another addictive medicine, we use plant-based medicine, stem cells, super foods, Ibogaine and Ayahuasca as part of the system." - theholisticsanctuary.com                                                                                                                                                                                                                                                                                                                                                                                                                                                                                                                                                                                                                                                                                                                                                                                                 |

The majority of the clinics from the sample were located in the United States (see Table 4). Also, despite using CAM-focused search terms and not searching specifically for medical doctors, over half of the web domains marketing stem cell therapies featured medical doctors (130). Sixty-six (66) of the 368 websites featured medical doctors along with at least one CAM practitioner. Other common practitioner types included chiropractors (53), naturopaths (44) and acupuncturists (20). Table 5 summarizes the practitioner types noted in the results.

1  
2  
3  
4  
5  
6  
7  
8  
9  
10  
11  
12  
13  
14  
15  
16  
17  
18  
19  
20  
21  
22  
23  
24  
25  
26  
27  
28  
29  
30  
31  
32  
33  
34  
35  
36

| Country              | Full Sample,<br>n=368 |       | Only Clinics<br>Offering Stem<br>Cell<br>Therapies,<br>n=243 |       |
|----------------------|-----------------------|-------|--------------------------------------------------------------|-------|
|                      | Totals                | %     | Totals                                                       | %     |
| United States        | 295                   | 80.16 | 208                                                          | 85.60 |
| India                | 19                    | 5.16  | 8                                                            | 3.29  |
| Canada               | 14                    | 3.80  | 7                                                            | 2.88  |
| Australia            | 8                     | 2.17  | 2                                                            | 0.82  |
| Mexico               | 7                     | 1.90  | 6                                                            | 2.47  |
| United Kingdom       | 7                     | 1.90  | 1                                                            | 0.41  |
| Thailand             | 6                     | 1.63  | 4                                                            | 1.65  |
| China                | 3                     | 0.82  | 2                                                            | 0.82  |
| Isreal               | 2                     | 0.54  | 0                                                            | 0.00  |
| Denmark              | 2                     | 0.54  | 2                                                            | 0.82  |
| United Arab Erimates | 1                     | 0.27  | 1                                                            | 0.41  |
| Netherlands          | 1                     | 0.27  | 1                                                            | 0.41  |
| Serbia               | 1                     | 0.27  | 1                                                            | 0.41  |
| Lithuania            | 1                     | 0.27  | 0                                                            | 0.00  |
| Ireland              | 1                     | 0.27  | 0                                                            | 0.00  |
| Pakistan             | 1                     | 0.27  | 1                                                            | 0.41  |
| Hong Kong            | 1                     | 0.27  | 1                                                            | 0.41  |
| New Zealand          | 1                     | 0.27  | 1                                                            | 0.41  |

37  
38  
39  
40  
41  
42  
43  
44  
45  
46  
47  
48  
49  
50  
51  
52  
53  
54  
55  
56  
57  
58  
59  
60

| Practitioner      | Full Sample,<br>n=368 |       | Only Clinics<br>Offering Stem<br>Cell<br>Therapies,<br>n=243 |       |
|-------------------|-----------------------|-------|--------------------------------------------------------------|-------|
|                   | Totals                | %     | Totals                                                       | %     |
| Medical Doctor    | 161                   | 43.75 | 130                                                          | 53.50 |
| Naturopath        | 63                    | 17.12 | 44                                                           | 18.11 |
| Chiropractor      | 61                    | 16.58 | 53                                                           | 21.81 |
| Acupuncturist     | 36                    | 9.78  | 20                                                           | 8.23  |
| Midwife           | 33                    | 8.97  | 0                                                            | 0.00  |
| Homeopath         | 27                    | 7.34  | 8                                                            | 3.29  |
| Massage Therapist | 13                    | 3.53  | 13                                                           | 5.35  |
| Aesthetician      | 9                     | 2.45  | 7                                                            | 2.88  |

|                  |    |       |    |       |
|------------------|----|-------|----|-------|
| Registered Nurse | 7  | 1.90  | 6  | 2.47  |
| Ayurvedic Doctor | 2  | 0.54  | 1  | 0.41  |
| Other            | 74 | 20.11 | 57 | 23.46 |
| Not Specified    | 34 | 9.24  | 22 | 9.05  |

A low percentage of the domains advertising stem cell therapies stated that there was limited evidence of efficacy of the interventions (18.93%), or that there was evidence of inefficacy (12.76%). Only some domains mentioned general risks associated with an intervention (such as the small risk of infection or allergic reaction from injecting a substance with a needle) (24.69%), and even fewer mentioned risks specific to the mode of therapy (such as the potential to cause further damage to a joint by injecting cells into it) (5.76%). A minority of domains mentioned the regulatory (e.g. FDA) status of the intervention (30.86%), and only 33.33% noted that the therapy is experimental or unproven. Hype language, defined as exaggerated or extreme language when speaking about potential benefits (e.g. breakthrough, revolutionary, cure, incredible, amazing, magical, etc.) was found on 31.69% of the web domains offering stem cell therapies. See Table 6 for greater detail on the disclosures made on the web domains, and for examples of excerpts.

| Claim/Language Used                               | YES | NO  | % (YES) | % (NO) | Example (Excerpt) fulfilling "Yes" Coding Selection                                                                                                                                                                                                                                                                                                                                                                                                                                                                                                                                                                                                                                                                                                      |
|---------------------------------------------------|-----|-----|---------|--------|----------------------------------------------------------------------------------------------------------------------------------------------------------------------------------------------------------------------------------------------------------------------------------------------------------------------------------------------------------------------------------------------------------------------------------------------------------------------------------------------------------------------------------------------------------------------------------------------------------------------------------------------------------------------------------------------------------------------------------------------------------|
| States Evidence of Inefficacy                     | 31  | 212 | 12.76%  | 87.24% | "Those who undergo stem cell treatment normally have about a 15% likelihood of receiving no benefits from stem cell treatment."<br>- regenorthoclinic.com                                                                                                                                                                                                                                                                                                                                                                                                                                                                                                                                                                                                |
| States That There is Limited Evidence of Efficacy | 46  | 197 | 18.93%  | 81.07% | "Stem cells have the potential to cure the disease from its root; however it is not approved by FDA as proven results are not yet available."<br>- stemgenn.com                                                                                                                                                                                                                                                                                                                                                                                                                                                                                                                                                                                          |
| States General Risks                              | 60  | 183 | 24.69%  | 75.31% | "Any time you penetrate the skin there is a small risk of infection. Our procedures are performed using strict aseptic techniques, so infection is rare, occurring in only about 1 of every 10,000 patients. Other possible complications include allergic reactions to local anesthetic and bleeding, and both are extremely rare."<br>- dhpmcharlotte.com                                                                                                                                                                                                                                                                                                                                                                                              |
| States Risks Specific to Mode of Therapy          | 14  | 229 | 5.76%   | 94.24% | "There are certain unavoidable risks and potential side effects and complications to the Treatments, including without limitation swelling; increased pain; bleeding; dizziness, numbness; scarring; scar or keloid formation; asymmetry; allergic reaction; discoloration; soreness, itching, a feeling of "lumpiness" or permanent skin contour irregularities at the site of Treatments;, all of which may be permanent. Treatment may very rarely cause infection; injury to nerves, temporary or permanent alteration in sensation; the need for additional surgery or hospitalization; spinal cord injuries, pneumothorax (temporary lung collapse), paralysis, or other serious or debilitating injuries or death" - mauiregenerativemedicine.com |

|                                            |    |     |        |        |                                                                                                                                                                                                                                                                                                                                                                                                                                                                                                                                                                                                                                                                                                                                                                         |
|--------------------------------------------|----|-----|--------|--------|-------------------------------------------------------------------------------------------------------------------------------------------------------------------------------------------------------------------------------------------------------------------------------------------------------------------------------------------------------------------------------------------------------------------------------------------------------------------------------------------------------------------------------------------------------------------------------------------------------------------------------------------------------------------------------------------------------------------------------------------------------------------------|
| States Regulatory Status                   | 75 | 168 | 30.86% | 69.14% | "The Food and Drug Administration (FDA) has NOT approved the use of adult stem cells/SVF for any disorder. The Cell Surgical Network and its affiliate treatment centers are not offering stem cell therapy as a cure for any condition, disease, or injury. No statements or implied treatments on this website have been evaluated or approved by the FDA. This website contains no medical advice." - innovationsstemcellcenter.com                                                                                                                                                                                                                                                                                                                                  |
| States Therapy is Experimental or Unproven | 81 | 162 | 33.33% | 66.67% | "That being said, the cutting edge stem cell therapy is still considered experimental. Stem cells are currently being studied in many arenas, and the prospect for health improvement using stem cells is great, but many results at this point have only been studying on very few patients. We perform stem cell therapy for the benefit of our patients, and are not involved in any clinical trials." - drandrewlipton.com                                                                                                                                                                                                                                                                                                                                          |
| Uses Hype Language                         | 77 | 166 | 31.69% | 68.31% | 1. "Researchers have finally found the "fountain of youth" and it can regenerate your bodily processes by ridding you of all sorts of degenerative diseases and aging cells." - stemgenn.com<br>2. "A Revolution in Biologics: There is a major gap for orthopedic treatment options between conservative treatment and surgery. Platelet Rich Plasma and stem cells from Bone Marrow Concentrate offer a therapeutic treatment option." - sheinkopmd.com<br>3. - "Breakthrough Healing for Degenerative Diseases and Chronic Ailments: Are you tired of trying traditional treatment options with little to no change? Do you want to avoid costly, painful surgery? Stem cell therapy could be the answer you're looking for!" - neworleans.allamericanhealthcare.net |

Intercoder reliability testing was completed for 79 of the 368 entries, or 21.47% of the sample. Kappa scores were calculated based on intercoder agreement, and are summarized in Table 7. The scores reflect substantial to perfect agreement between coders.[26]

|                                                    |        |
|----------------------------------------------------|--------|
| Practitioner                                       | 0.8665 |
| Modes of Stem Cell Therapy Offered                 | 0.9672 |
| Advertised Stem Cell Treatment Targets             | 0.9009 |
| Other Treatments Offered That Reference Stem Cells | 0.9268 |
| States Evidence of Inefficacy                      | 1.0000 |
| States That There is Limited Evidence of Efficacy  | 1.0000 |
| States General Risks                               | 1.0000 |
| States Risks Specific to Mode of Therapy           | 1.0000 |
| States Regulatory Status                           | 0.9617 |
| States Therapy is Experimental or Unproven         | 0.9660 |
| Uses Hype Language                                 | 1.0000 |

Selected examples of stem cell-related claims, sorted by practitioner type listed on the relevant web domain, are included in Table 8.

**Table 8: Selected Examples of Stem Cell-Related Claims Made, by Practitioner Type Listed on Website**

| Practitioner Type | Examples of Claims                                                                                                                                                                                                                                                                                                                                                                                                                                                                                                                                                                                                                                                                 |
|-------------------|------------------------------------------------------------------------------------------------------------------------------------------------------------------------------------------------------------------------------------------------------------------------------------------------------------------------------------------------------------------------------------------------------------------------------------------------------------------------------------------------------------------------------------------------------------------------------------------------------------------------------------------------------------------------------------|
| Medical Doctor    | "When it comes to Regenerative Orthopedics, stem cells are a game changer. They make our regenerative injection techniques much more effective. Stem cell therapy is the strongest, fastest and most effective regenerative stimulus we have." -regenortho.com                                                                                                                                                                                                                                                                                                                                                                                                                     |
| Naturopath        | "Our regenerative and biological treatments include Prolotherapy, Platelet Rich Plasma PRP, and Adult Stem Cell Therapies. These treatments enhance the natural cycles of repair in chronically injured joints, ligaments and tendons. Regenerative injections are an effective treatment for all manner of acute and chronic back and neck pain, as well as osteoarthritis and injuries to the hip, knee, shoulder, elbow, wrist, foot and ankle. For our patients who have been told that their only solution is surgery or a life on pain medications, the vast majority have been able to achieve drug-free, pain-free function without surgery joint replacement." -myctm.org |
| Acupuncturist     | "This QiGong form has proven scientific effects of stimulating and activating adult stem cells in our bone marrow; gently elongating and improving flexibility of the spine, alleviating neck, back and joint pain." -taoistacupuncture.com                                                                                                                                                                                                                                                                                                                                                                                                                                        |
| Chiropractor      | "Stem Cell Therapy: If you are suffering with chronic pain, this new breakthrough treatment could change your life! Eliminate knee pain with the industry's latest proven alternative to surgery and steroids." -activephysicalmedicine.com                                                                                                                                                                                                                                                                                                                                                                                                                                        |
| Homeopath         | "Every day, Marnie supports women in restoring health and well-being to their digestive systems using homeopathy and Plant Stem Cells so they have the energy to do the things they love." -resplendenthealing.com                                                                                                                                                                                                                                                                                                                                                                                                                                                                 |
| Midwife           | "Cord blood contains magical stem cells, and the idea is that if your baby becomes ill in the future you may be able to use these cells as treatment." -katybirthcenter.com                                                                                                                                                                                                                                                                                                                                                                                                                                                                                                        |
| Ayurvedic Doctor  | "Experts say, "Successful regenerative medicine centered on human cells could potentially replace a number of major molecular pharmaceuticals and medical prostheses." Heart Cardiac myocytes possess the capacity for regeneration after heart attacks. Heart tissue can also be regenerated from stem cells derived from bone marrow." -ayurvedicscience.com                                                                                                                                                                                                                                                                                                                     |
| Aesthetician      | "ARGAN PLANT STEM CELLS: These are the first plant stem cells with proven effectiveness for deep-seated cell protection and rejuvenation. Clinical results confirm Argan Stem Cells reduce wrinkles by 26% while tightening, toning and improving skin density." -jadeholisticspa.com                                                                                                                                                                                                                                                                                                                                                                                              |
| Registered Nurse  | "Stem cells can be found in every tissue in every human body, but are especially concentrated in bone marrow, blood, and adipose(fatty) cells. Stems cells are what make regenerative therapies like PRP therapy so effective; by harvesting cells from fatty tissue in this new treatment, we can send 10,000x more stem cells into your body than PRP therapy!" -drandrewlipton.com (RN's were only featured alongside other practitioners; Andrew Lipton is an osteopath)                                                                                                                                                                                                       |
| Massage Therapist | "From Aloe Vera to L-Ascorbic Acid to Peptides and Plant Stem Cells, every ingredient in my formulas works in harmony with the skin's natural processes." -bodhiholisticspa.com                                                                                                                                                                                                                                                                                                                                                                                                                                                                                                    |

1  
2  
3  
4  
5  
6  
7  
8  
9  
10  
11  
12  
13  
14  
15  
16  
17  
18  
19  
20  
21  
22  
23  
24  
25  
26  
27  
28  
29  
30  
31  
32  
33  
34  
35  
36  
37  
38  
39  
40  
41  
42  
43  
44  
45  
46  
47  
48  
49  
50  
51  
52  
53  
54  
55  
56  
57  
58  
59  
60

Other

1. (Pharmacist) "Stem Cell Worx Intraoral Spray is the world's only natural stem cell supplement in an intramural spray, and it's available at The Compounding Pharmacy of Beverly Hills today. It is designed specifically to activate your own adult stem cells naturally and provides robust immunity."

-compoundingexpert.com

2. "The marrow is rich in Mesenchymal Stem Cells, which are responsible for healing damaged tissues. The stems cells are isolated from the marrow sample and platelets are isolated from the blood sample. After preparation, these two components will be reinjected directly into the damaged area of the joint using advanced imaging guidance. This ensures the cells are delivered to the exact location of need."

-louisvillebodyworks.com

## Discussion

It is concerning that the majority of the web domains advertising stem cell-related interventions did not include disclosures about scientific evidence of efficacy (or lack thereof), about general and/or specific risks associated with the intervention(s) offered, about the experimental nature of the treatments, or about their regulatory status. This finding is consistent with past research on the marketing of stem cell therapies, which has indicated similar deficiencies and potentially problematic advertising practices.[13,27-29] Failing to provide accurate and complete information may impact potential patients' ability to give informed consent to treatment, and exaggerated claims, including potentially false, misleading or deceptive promotion, may risk running afoul of marketing regulations.

It is notable to see how many CAM practitioners are offering stem cell-related interventions, or in some other way using stem cells to market their products or services. Of course, it is important to distinguish interventions involving stem cell injections and those that merely reference stem cells for advertising effect (or in some cases, potentially for scientifically justified reasons). The former can present serious physical risks to patients receiving injections, and while the latter can also cause harm, they tend to be less invasive and lower risk. Stem cell science, research and clinical application are very specialized, and it is highly unlikely that the broad array of CAM practitioners noted in this study each have the requisite expertise to work with stem cells in a safe and effective manner.[6] In some cases, and depending on the jurisdiction, these practitioners are either unregulated, regulated less stringently than medical doctors, or have been granted self-regulation but have failed to either establish and/or enforce any clearly defined evidence-based standard of care.[30] Professional regulation – including self-regulation – of CAM providers is growing,[31,32] though there remains concern about a lack of appropriate oversight.[30] Where a particular category of CAM practitioners is professionally regulated, employing professional oversight and discipline may be one option for controlling problematic practices. However, the ability and willingness of CAM regulators to set and enforce relevant standards in this context remains to be seen. At present it seems likely that other strategies – such as the use of consumer protection and truth-in-advertising laws – may be more readily available and broadly relevant.

Despite our focus on CAM in the methodology and the presence of many CAM practitioners marketing stem cell therapies in our results, we were surprised that medical doctors were still the most common practitioner type noted. These results highlight again the critical role the medical community and its regulatory bodies, such as medical colleges, have in



1  
2  
3 ensuring physicians are not engaging in unprofessional conduct with respect to their  
4 clinical or marketing practices.[8,17,33,34,35]  
5

6  
7 In this research, we found that 116 web domains advertised non-stem cell interventions  
8 with language that references stem cells (see Table 2 for examples), which was arguably  
9 done in order to leverage the excitement surrounding stem cell science in order to market  
10 products. The application of truth-in-advertising laws may be one way to ensure that  
11 claims made are not false or misleading in a material respect,[36] and thus do not  
12 contribute to this kind of inappropriate “scienceploitation”.  
13

14  
15 Many countries around the world have laws and policies, supported by enforcement  
16 agencies, prohibiting demonstrably false or misleading marketing claims.[19] For example,  
17 In the United States, the Federal Trade Commission regulates marketing claims using the  
18 *Federal Trade Commission Act*, and prohibits “deceptive and unfair acts or practices”, that is  
19 to say those that mislead consumers and affect their “behavior or decisions about the  
20 product or service”. [37,38] Similarly, in Canada, the Competition Bureau enforces the  
21 *Competition Act* which requires that representations must not be false or misleading “in a  
22 material respect”, that is to say in a manner that could “influence the ordinary consumer to  
23 buy or use the advertised product or service”. [39,40] Although not without their challenges  
24 in terms of application and enforcement, these consumer protection and truth-in-  
25 advertising governance frameworks are certainly relevant to, and in some cases should be  
26 triggered by, the questionable claims found in this study, especially those regarding the  
27 safety, efficacy and the supposedly “revolutionary” quality of some interventions  
28 advertised.  
29  
30

### 31 32 **Limitations** 33

34  
35 While the study covered the majority of the most common CAM providers used in the US  
36 (excepting massage therapists which were not specifically searched for given the context of  
37 stem cells, but were nonetheless noted),[41] the search terms selected did not fully  
38 encompass the gamut of existing CAM practitioner types, omitting many less common  
39 types, including reiki providers, reflexologists, etc. Moreover, given the fact that the search  
40 was undertaken in the English language on the American version of the Google search  
41 engine, there may have been an overrepresentation of American and/or English-speaking  
42 clinics. As mentioned in the methods, the coding frame was applied only to the specific  
43 webpages on web domains where the term “stem cell” was found by Google, and not to the  
44 entirety of existing content on a given domain. It is therefore possible that broad  
45 disclaimers and other relevant information were therefore excluded. Finally, our research  
46 focus was on exploring how, and by whom, stem cells are used to market health services  
47 and interventions. Though we did not evaluate claims against peer-reviewed scientific  
48 literature and thus cannot make any definitive statements as to the accuracy of any of the  
49 marketing claims, in future research this important task could be undertaken.  
50  
51  
52

### 53 54 **Conclusion** 55 56 57 58 59 60



1  
2  
3 Our research indicates that clinics using stem cell language to advertise their services do so  
4 in many different forms, for many different conditions, and often without disclosing  
5 evidence, risks, or regulatory information. Many CAM practitioners are now actively  
6 involved in offering and advertising stem cell-based interventions, often alongside  
7 physicians. Professional regulation may provide one avenue of oversight and enforcement  
8 for problematic conduct, but its application will be limited to regulated health professionals  
9 and impacted considerably by the strength (and will) of the regulatory regime. The  
10 questionable nature of many of the claims we found, along with the absence of important  
11 qualifying information, suggests consumer protection and truth-in-advertising regulations  
12 are highly relevant to this market and indeed could prove very useful in constraining some  
13 of the more egregious marketing practices identified. The applicability of these regulatory  
14 regimes do not depend on the professional status of those advertising the services and  
15 rather typically focus on the general impression the representation conveys to the  
16 public.[42]  
17  
18  
19  
20

21 The use of consumer protection and truth-in-advertising regulation to curtail misleading  
22 advertising in the private, direct-to-consumer market for stem cell interventions is an area  
23 well worth further research and consideration. Important questions will include how  
24 existing legal and policy tools could be used to regulate the claims made by clinics  
25 advertising stem cell-related interventions, and how to effectively enforce the law among  
26 clinics or individual practitioners that engage in misleading marketing practices –  
27 particularly given the cross-border nature of this market. A related issue that also bears  
28 monitoring is how the practices of clinics offering unproven stem cell interventions relate  
29 to concerns about “scienceploitation” and its potential harms. Many clinics seem to be  
30 engaging in scienceploitation, which can seriously obfuscate public discourse, mislead the  
31 public, and make it difficult to discern real science from marketing claims that merely  
32 reference scientific sounding terminology. The marketing of unproven stem cell therapies  
33 has the potential to harm patients, and to harm the reputation of stem cell science. It is  
34 incumbent upon regulators and policy makers to take a proactive approach to managing  
35 the risks associated with the growing private market for stem cell-related interventions,  
36 and addressing misleading marketing practices is an important part of this strategy.  
37  
38  
39  
40

## 41 **References**

- 42  
43 1. International Society for Stem Cell Research. ISSCR 2017 Highlights New Discoveries  
44 in Stem Cell Research & Progress Toward Clinical Therapies. 25 April 2017.  
45 Accessed July 14, 2017. [http://www.isscr.org/home/about-us/news-press-](http://www.isscr.org/home/about-us/news-press-releases/2016/2017/04/25/isscr-2017-highlights-new-discoveries-in-stem-cell-research-progress-toward-clinical-therapies)  
46 [releases/2016/2017/04/25/isscr-2017-highlights-new-discoveries-in-stem-cell-](http://www.isscr.org/home/about-us/news-press-releases/2016/2017/04/25/isscr-2017-highlights-new-discoveries-in-stem-cell-research-progress-toward-clinical-therapies)  
47 [research-progress-toward-clinical-therapies](http://www.isscr.org/home/about-us/news-press-releases/2016/2017/04/25/isscr-2017-highlights-new-discoveries-in-stem-cell-research-progress-toward-clinical-therapies)  
48
- 49 2. Guzzo RM, O’Sullivan MB. Human Pluripotent Stem Cells: Advances in Chondrogenic  
50 Differentiation and Articular Cartilage Regeneration. *Current Molecular Biology*  
51 *Reports*. 2016 Sep 1;2(3):113-22.  
52
- 53 3. Caulfield T, Sipp D, Murry CE, Daley GQ, Kimmelman J. Confronting stem cell hype.  
54 *Science*. 2016 May 13;352(6287):776-7.  
55
- 56 4. International Society for Stem Cell Research. Patient Handbook on Stem Cell  
57 Therapies. December 3, 2008. Accessed July 14, 2017.  
58  
59  
60

- 1  
2  
3 <http://www.closerlookatstemcells.org/docs/default-source/patient-resources/patient-handbook---english.pdf?sfvrsn=4>
- 4  
5  
6 5. A Closer Look at Stem Cells. Nine Things To Know About Stem Cell Treatments (ISSCR). 2015. Accessed July 14, 2017. <http://www.closerlookatstemcells.org/stem-cells-and-medicine/nine-things-to-know-about-stem-cell-treatments>.
- 7  
8  
9 6. Daley GQ. Polar Extremes in the Clinical Use of Stem Cells. *N Engl J Med*. 2017;376:1075-77.
- 10  
11  
12 7. Deans RJ, Gunter KC, Dominici M, Forte M. Part 5: Unproven cell therapies and the commercialization of cell-based products. *Cytotherapy*. 2016 Jan 1;18(1):138-42.
- 13  
14 8. Ikonomou L, Freishtat RJ, Wagner DE, Panoskaltzis-Mortari A, Weiss DJ. The global emergence of unregulated stem cell treatments for respiratory diseases. Professional societies need to act. *Annals of the American Thoracic Society*, 2016; 13(8): 1205-1207).
- 15  
16  
17 9. Berger I, Ahmad A, Bansal A, et al. Global Distribution of Businesses Marketing Stem Cell-Based Interventions. *Cell Stem Cell*, 2016; 4: 158-162.
- 18  
19  
20 10. U.S. Food & Drug Administration. Vaccines, Blood & Biologics; Cellular & Gene Therapy Products; Approved Products; Marketed Products. January 17, 2017. Accessed July 14, 2017. <https://www.fda.gov/BiologicsBloodVaccines/CellularGeneTherapyProducts/ApprovedProducts/default.htm>
- 21  
22  
23 11. Ogbogu U, Rachul C, Caulfield T. Reassessing direct-to-consumer portrayals of unproven stem cell therapies: is it getting better? *Regenerative medicine*. 2013 May;8(3):361-9.
- 24  
25  
26 12. RegenBerg A, Hutchinson L, Schanker B, Mathews D. Medicine on the Fringe: Stem Cell-Based Interventions in Advance of Evidence. *Stem Cells*. 2009. 27, 2312-2319.
- 27  
28  
29 13. Turner L, Knoepfler P. Selling stem cells in the USA: assessing the direct-to-consumer industry. *Cell Stem Cell*. 2016 Aug 4;19(2):154-7.
- 30  
31  
32 14. Berger I, Ahmad A, Bansal A, et al. Global Distribution of Businesses Marketing Stem Cell-Based Interventions. *Cell Stem Cell*, 2016; 4: 158-162.
- 33  
34  
35 15. The Cystic Fibrosis Foundation. Stem Cell Therapies and Research for Cystic Fibrosis. March 9, 2015. Accessed August 22, 2017. <https://www.cff.org/News/News-Archive/2015/Stem-Cell-Therapies-and-Research-for-Cystic-Fibrosis/>
- 36  
37  
38 16. Rosemann A, Sleeboom-Faulkner M. New regulation for clinical stem cell research in China: expected impact and challenges for implementation. *Regenerative Medicine*. 2016 11(1): 5-9.
- 39  
40  
41 17. Sipp D, Caulfield T, Kaye J, Barfoot J, Blackburn C, Chan S, De Luca M, Kent A, McCabe C, Munsie M, Sleeboom-Faulkner M. Marketing of unproven stem cell-based interventions: A call to action. *Science Translational Medicine*. 2017 Jul 5;9(397):eaag0426.
- 42  
43  
44 18. Health on the Net Foundation. The commitment to reliable health and medical information on the internet. Accessed November 16, 2017. <http://www.hon.ch/HONcode/Patients/Visitor/visitor.html>
- 45  
46  
47 19. Ogbogu U. Combating Unlicensed Stem Cell Interventions Through Truthful Advertising Law: A Survey of Regulatory Trends. *McGill Journal of Law and Health*. 2016. 9(2): 311-335.
- 48  
49  
50  
51  
52  
53  
54  
55  
56  
57  
58  
59  
60

20. Zarzeczny A, Caulfield T, Ogbogu U, et al. Professional Regulation: A Potentially Valuable Tool in Responding to “Stem Cell Tourism”. *Stem Cell Reports*. 2014. 3(3): 379-384.
21. California Naturopathic Doctors Association. Naturopathic Doctors are Primary Care Doctors. CNDA. Accessed November 15, 2017.  
<http://www.calnd.org/files/CNDA%20NDs%20are%20Primary%20Care%20Doctors%20FINAL%202-18-13.pdf>
22. The American Association of Naturopathic Physicians. What is a Naturopathic Doctor? AANP. 2017. Accessed November 15, 2017.  
<http://www.naturopathic.org/content.asp?contentid=60>
23. Caulfield T, Rachul C. Supported by science?: what Canadian naturopaths advertise to the public. *Allergy, Asthma & Clinical Immunology*. 2011 Sep 15;7(1):14.
24. Caulfield T. Blinded by Science: Modern-day hucksters are cashing in on vulnerable patients. *The Walrus*, Sept. 12, 2011. Accessed July 19, 2017.  
<https://thewalrus.ca/blinded-by-science/>
25. Elo S, Kyngäs H. The qualitative content analysis process. *Journal of advanced nursing*. 2008 Apr 1;62(1):107-15.
26. McHugh ML. Interrater reliability: the kappa statistic. *Biochemia medica*. 2012 Oct 15;22(3):276-82.
27. D. Lau, U. Ogbogu, B. Taylor, T. Stafinski, D. Menon, T. Caulfield, Stem cell clinics online: The direct-to- consumer portrayal of stem cell medicine. *Cell Stem Cell* 3, 591–594 (2008).
28. Fujita M, Hatta T, Ozeki R, Akabayashi A. The current status of clinics providing private practice cell therapy in Japan. *Regenerative medicine*. 2016 Jan;11(1):23-32.
29. Regenber AC, Hutchinson LA, Schanker B, Mathews DJ. Medicine on the fringe: stem cell-based interventions in advance of evidence. *Stem Cells*. 2009 Sep 1;27(9):2312-9.
30. C Weeks. Are we being served by the regulation of naturopaths? Not if patients are still being misled. *The Globe and Mail*. April 28 2016. Accessed July 14, 2017.  
<https://www.theglobeandmail.com/life/health-and-fitness/health/canadian-naturopaths-need-to-follow-the-rules-if-they-want-regulation/article29785140/>
31. Gilmour J, Kelner M, Wellman B. Opening the door to Complementary and Alternative Medicine: Self-Regulation in Ontario. *Law and Policy*. 2002. 24(2): 149-174.
32. Welsh S, et al. Moving forward? Complementary and alternative practitioners seeking self-regulation. *Sociology of Health & Illness*. 2004. 26(2): 216-241.
33. Medical Board of California (MBC). (2007). In the Matter of the Accusation against Darryl Matthew See, M.D. Division of Medical Quality, Medical Board of California, Department of Consumer Affairs, State of California. Case No. 04-2004-161179.  
<http://www.casewatch.org/board/med/see/surrender.pdf>
34. SMC (Singapore Medical Council). Disciplinary Inquiry for Dr. Wong Yoke Meng. November 3, 2010.  
[http://www.healthprofessionals.gov.sg/content/dam/hprof/smc/docs/press\\_releases/14.Press%20Release\\_Dr%20Wong%20Yoke%20Meng\\_3Nov10.pdf](http://www.healthprofessionals.gov.sg/content/dam/hprof/smc/docs/press_releases/14.Press%20Release_Dr%20Wong%20Yoke%20Meng_3Nov10.pdf)

- 1  
2  
3 35. SMC (Singapore Medical Council). Press Release: Disciplinary inquiry for Dr. Wong  
4 Yoke Meng. November 9, 2010.  
5  
6 2. [http://www.healthprofessionals.gov.sg/content/dam/hprof/smc/docs/press\\_releases/15.Press%20Release\\_Dr%20Wong%20Yoke%20Meng4\\_9Nov10.pdf](http://www.healthprofessionals.gov.sg/content/dam/hprof/smc/docs/press_releases/15.Press%20Release_Dr%20Wong%20Yoke%20Meng4_9Nov10.pdf).  
7  
8 36. Competition Act, R.S.C. 1985, c. C-34, s. 74.01(1)(a).  
9  
10 37. Federal Trade Commission. (2000) Advertising and Marketing on the Internet: Rules  
11 of the Road. Accessed July 14, 2017. <https://www.ftc.gov/tips-advice/business-center/guidance/advertising-marketing-internet-rules-road>  
12  
13 38. Federal Trade Commission. (2016) Federal Trade Commission Act Sect 5: Unfair or  
14 Deceptive Acts or Practices.  
15 (<https://www.federalreserve.gov/boarddocs/supmanual/cch/ftca.pdf>)  
16  
17 39. Competition Act, RSC 1985, c C-34  
18  
19 40. Competition Bureau, "False and Misleading Representations and Deceptive  
20 Marketing Practices under the Competition Act" (3 November 2011), online:  
21 <http://www.competitionbureau.gc.ca/eic/site/cb-bc.nsf/eng/03133.html>  
22  
23 41. Barnes PM, Bloom B, Nahin R. CDC National Health Statistics Report  
24 #12. Complementary and Alternative Medicine Use Among Adults and Children:  
25 United States, 2007. December 10, 2008.  
26  
27 42. Competition Bureau. False or Misleading Representations and Deceptive Marketing  
28 Practices. <http://www.competitionbureau.gc.ca/eic/site/cb-bc.nsf/eng/03133.html>.  
29  
30  
31  
32  
33  
34  
35  
36  
37  
38  
39  
40  
41  
42  
43  
44  
45  
46  
47  
48  
49  
50  
51  
52  
53  
54  
55  
56  
57  
58  
59  
60

1 STROBE Statement—Checklist of items that should be included in reports of *cross-sectional studies*

|                                                   | <b>Item No</b> | <b>Recommendation</b>                                                                                                                                                                                                                                                                                                                      |
|---------------------------------------------------|----------------|--------------------------------------------------------------------------------------------------------------------------------------------------------------------------------------------------------------------------------------------------------------------------------------------------------------------------------------------|
| <b>Title and abstract</b>                         | 1              | <b>P.1 (a)</b> Indicate the study's design with a commonly used term in the title or the abstract                                                                                                                                                                                                                                          |
|                                                   |                | <b>P.1 (b)</b> Provide in the abstract an informative and balanced summary of what was done and what was found                                                                                                                                                                                                                             |
| <b>Introduction</b>                               |                |                                                                                                                                                                                                                                                                                                                                            |
| Background/rationale                              | 2              | <b>P.2-3</b> Explain the scientific background and rationale for the investigation being reported                                                                                                                                                                                                                                          |
| Objectives                                        | 3              | <b>P.3</b> State specific objectives, including any prespecified hypotheses                                                                                                                                                                                                                                                                |
| <b>Methods</b>                                    |                |                                                                                                                                                                                                                                                                                                                                            |
| Study design                                      | 4              | <b>P.3-4</b> Present key elements of study design early in the paper                                                                                                                                                                                                                                                                       |
| Setting                                           | 5              | <b>P.3-4</b> Describe the setting, locations, and relevant dates, including periods of recruitment, exposure, follow-up, and data collection                                                                                                                                                                                               |
| Participants                                      | 6              | <b>N/A (a)</b> Give the eligibility criteria, and the sources and methods of selection of participants                                                                                                                                                                                                                                     |
| Variables                                         | 7              | <b>P.3-4</b> Clearly define all outcomes, exposures, predictors, potential confounders, and effect modifiers. Give diagnostic criteria, if applicable                                                                                                                                                                                      |
| Data sources/ measurement                         | 8*             | <b>P.3-4</b> For each variable of interest, give sources of data and details of methods of assessment (measurement). Describe comparability of assessment methods if there is more than one group                                                                                                                                          |
| Bias                                              | 9              | <b>P.4</b> Describe any efforts to address potential sources of bias                                                                                                                                                                                                                                                                       |
| Study size                                        | 10             | <b>P.3-4</b> Explain how the study size was arrived at                                                                                                                                                                                                                                                                                     |
| Quantitative variables                            | 11             | <b>N/A</b> Explain how quantitative variables were handled in the analyses. If applicable, describe which groupings were chosen and why                                                                                                                                                                                                    |
| Statistical methods <b>N/A</b><br>(Kappa on P.10) | 12             | (a) Describe all statistical methods, including those used to control for confounding<br>(b) Describe any methods used to examine subgroups and interactions<br>(c) Explain how missing data were addressed<br>(d) If applicable, describe analytical methods taking account of sampling strategy<br>(e) Describe any sensitivity analyses |
| <b>Results</b>                                    |                |                                                                                                                                                                                                                                                                                                                                            |
| Participants <b>N/A</b>                           | 13*            | (a) Report numbers of individuals at each stage of study—eg numbers potentially eligible, examined for eligibility, confirmed eligible, included in the study, completing follow-up, and analysed<br>(b) Give reasons for non-participation at each stage<br>(c) Consider use of a flow diagram                                            |
| Descriptive data <b>N/A</b>                       | 14*            | (a) Give characteristics of study participants (eg demographic, clinical, social) and information on exposures and potential confounders<br>(b) Indicate number of participants with missing data for each variable of interest                                                                                                            |
| Outcome data <b>P.4-11</b>                        | 15*            | Report numbers of outcome events or summary measures                                                                                                                                                                                                                                                                                       |
| Main results <b>N/A</b>                           | 16             | (a) Give unadjusted estimates and, if applicable, confounder-adjusted estimates and their precision (eg, 95% confidence interval). Make clear which confounders were adjusted for and why they were included                                                                                                                               |

|                          |    |                                                                                                                                                                            |
|--------------------------|----|----------------------------------------------------------------------------------------------------------------------------------------------------------------------------|
|                          |    | (b) Report category boundaries when continuous variables were categorized                                                                                                  |
|                          |    | (c) If relevant, consider translating estimates of relative risk into absolute risk for a meaningful time period                                                           |
| Other analyses P.6       | 17 | Report other analyses done—eg analyses of subgroups and interactions, and sensitivity analyses                                                                             |
| <b>Discussion</b>        |    |                                                                                                                                                                            |
| Key results P.12         | 18 | Summarise key results with reference to study objectives                                                                                                                   |
| Limitations P.13         | 19 | Discuss limitations of the study, taking into account sources of potential bias or imprecision. Discuss both direction and magnitude of any potential bias                 |
| Interpretation P.12-13   | 20 | Give a cautious overall interpretation of results considering objectives, limitations, multiplicity of analyses, results from similar studies, and other relevant evidence |
| Generalisability P.12-14 | 21 | Discuss the generalisability (external validity) of the study results                                                                                                      |
| <b>Other information</b> |    |                                                                                                                                                                            |
| Funding P.2              | 22 | Give the source of funding and the role of the funders for the present study and, if applicable, for the original study on which the present article is based              |

\*Give information separately for exposed and unexposed groups.

**Note:** An Explanation and Elaboration article discusses each checklist item and gives methodological background and published examples of transparent reporting. The STROBE checklist is best used in conjunction with this article (freely available on the Web sites of PLoS Medicine at <http://www.plosmedicine.org/>, Annals of Internal Medicine at <http://www.annals.org/>, and Epidemiology at <http://www.epidem.com/>). Information on the STROBE Initiative is available at [www.strobe-statement.org](http://www.strobe-statement.org).



# BMJ Open

## Exploiting science? A systematic analysis of complementary and alternative medicine clinic websites' marketing of stem cell therapies

|                                    |                                                                                                                                                                                                                                                                |
|------------------------------------|----------------------------------------------------------------------------------------------------------------------------------------------------------------------------------------------------------------------------------------------------------------|
| Journal:                           | <i>BMJ Open</i>                                                                                                                                                                                                                                                |
| Manuscript ID                      | bmjopen-2017-019414.R2                                                                                                                                                                                                                                         |
| Article Type:                      | Research                                                                                                                                                                                                                                                       |
| Date Submitted by the Author:      | 02-Jan-2018                                                                                                                                                                                                                                                    |
| Complete List of Authors:          | Murdoch, Blake; University of Alberta, Health Law Institute, Faculty of Law<br>Zarzeczny, Amy; University of Regina, Johnson Shoyama Graduate School<br>of Public Policy<br>Caulfield, Timothy; University of Alberta, Health Law Institute, Faculty of<br>Law |
| <b>Primary Subject<br>Heading</b>: | Complementary medicine                                                                                                                                                                                                                                         |
| Secondary Subject Heading:         | Rehabilitation medicine, Communication                                                                                                                                                                                                                         |
| Keywords:                          | Stem Cells, COMPLEMENTARY MEDICINE, Marketing                                                                                                                                                                                                                  |
|                                    |                                                                                                                                                                                                                                                                |

SCHOLARONE™  
Manuscripts

## Exploiting science? A systematic analysis of complementary and alternative medicine clinic websites' marketing of stem cell therapies

Blake Murdoch<sup>i</sup>, Amy Zarzeczny<sup>ii</sup> and Timothy Caulfield<sup>iii</sup>

<sup>i</sup> Health Law Institute, Faculty of Law, University of Alberta, Edmonton, Alberta, Canada

<sup>ii</sup> Johnson Shoyama Graduate School of Public Policy, University of Regina, Regina, Saskatchewan, Canada

<sup>iii</sup> Health Law Institute, Faculty of Law; Law Centre, University of Alberta, 91 University Campus NW, Edmonton, Alberta T6G 2H5; 780-492-9575; caulfield@ualberta.ca

### Abstract

**Objective:** To identify the frequency and qualitative characteristics of stem cell-related marketing claims made on websites of clinics featuring common types of complementary and alternative medicine practitioners. The involvement of complementary and alternative medicine practitioners in the marketing of stem cell therapies and stem cell-related interventions is understudied. This research explores the extent to which they are involved and collaborate with medical professionals. This knowledge will help with identifying and evaluating potential policy responses to this growing market.

**Design:** Systematic website analysis.

**Setting:** Global. United States and English language bias due to methodology.

**Main outcome measures:** Representations made on clinic websites in relation to: practitioner types, stem cell therapies and their targets, stem cell-related interventions. Statements about stem cell therapies relating to: evidence of inefficacy, limited evidence of efficacy, general procedural risks, risks specific to the mode of therapy, regulatory status, experimental or unproven nature of therapy. Use of hype language (e.g., language that exaggerates potential benefits).

**Results:** 243 websites offered stem cell therapies. Many websites advertised stem cell transplantation from multiple sources, such as adipose-derived (112), bone marrow-derived (100), blood-derived (28), umbilical cord-derived (26), and others. Plant stem cell-based treatments and products (20) were also advertised. Purposes for and targets of treatment included pain, physical injury, a wide range of diseases and illnesses, cosmetic concerns, non-cosmetic aging, sexual enhancement, and others. Medical doctors (130), chiropractors (53) and naturopaths (44) commonly work in the clinics we found to be offering stem cell therapies. Few clinic websites advertising stem cell therapies included important additional information, including: statements about evidence of inefficacy (present on only 12.76% of websites), statements about limited evidence of efficacy (18.93%), statements of general risks (24.69%), statements of risks specific to the mode(s) of therapy (5.76%), statements as to the regulatory status of the therapies (30.86%), and statements that the therapy is experimental or unproven (33.33%). Hype language was noted (31.69%).

**Conclusions:** Stem cell therapies and related interventions are marketed for a wide breadth of conditions, and are being offered by complementary and alternative practitioners, often in conjunction with medical doctors. Consumer protection and truth-in-

1  
2  
3 advertising regulation could play important roles in addressing misleading marketing  
4 practices in this area.  
5

### 6 **Strengths and Limitations of This Study**

- 7 • The involvement of complementary and alternative medicine practitioners in the  
8 marketing of stem cell therapies and stem cell-related interventions is  
9 understudied, and this research helps us understand the extent to which they are  
10 involved, and also the extent to which they collaborate with medical professionals.
- 11 • The methodology was designed in such a way that human error was minimized;  
12 manual searching of websites was largely replaced by automated domain searches  
13 by Google, which helped coders to achieve near perfect agreement in Cohen's Kappa  
14 reliability testing.
- 15 • The search terms selected did not fully encompass the gamut of existing  
16 complementary and alternative medicine practitioner types, omitting some less  
17 common types such as reiki providers, reflexologists, etc.
- 18 • Because the coding frame was applied solely to the specific webpages on web  
19 domains where the term "stem cell" was found by Google, and not to the entirety of  
20 existing content on a given domain, it is possible that broad disclaimers and other  
21 relevant information were excluded.  
22  
23  
24  
25

### 26 **Funding Statement**

27 This work was supported by the Stem Cell Network, grant number FY17/PP1 RES0032389,  
28 and the Trudeau Foundation, grant number RES0019335.  
29  
30

### 31 **Competing Interests Statement**

32 The authors declare no competing interests.  
33  
34

### 35 **Data Sharing Statement**

36 Original dataset and time-stamped screenshots of all example statements found in the  
37 tables are available upon request to the corresponding author.  
38  
39

### 40 **Acknowledgments**

41 The authors would like to thank Robyn Hyde-Lay for her advice and guidance, and for her  
42 aid in developing applications to secure funding for this project. The authors would also  
43 like to thank research assistants Daniel Downie, Yassine El Balhouli and Corinna Liu for  
44 their help with data collection.  
45  
46

### 47 **Author Contribution Statement**

48 Murdoch, Zarzeczny and Caulfield designed the study, analyzed the data and wrote the  
49 manuscript.  
50

### 51 **Introduction**

52  
53  
54 Stem cell research has considerable clinical potential and scientific discoveries continue to  
55 advance our knowledge in this field.[1,2] Yet, despite enthusiastic media coverage of the  
56  
57  
58  
59

1  
2  
3 field,[3] only a few stem cell-based therapies are currently ready for clinical application.[4-  
4 6] This reality has not stopped the proliferation of clinics around the world advertising a  
5 wide array of unproven stem cell-based interventions.[7-9] Many of these clinics use a  
6 direct-to-consumer marketing system based on an online presence. [10,11] While much of  
7 the early growth in the commercial market for unproven stem cell-based interventions  
8 occurred in Asia,[12] it is currently spreading to jurisdictions throughout the world.[13,14]  
9 Furthermore, complementary and alternative medicine [CAM] practitioners have begun to  
10 offer stem cell-based interventions, marking a further expansion of this market.  
11  
12

13  
14 Many of these interventions are marketed despite lack of approval by relevant regulatory  
15 bodies like the U.S Food and Drug Administration's [FDA's] Center for Biologics Evaluation  
16 and Research.[10] The market also continues to flourish despite denunciation by research  
17 bodies like the International Society of Stem Cell Research,[5] cautions issued by  
18 professional societies,[15] and legislative attempts to constrain it,[16] among other efforts.  
19 The apparent resilience of this market suggests regulators and policymakers need to  
20 explore diverse approaches for addressing the various concerns associated with it.[17]  
21  
22

23 While there are services that seek to encourage websites to provide accurate health  
24 information [18], the continued proliferation of misleading marketing highlights the need  
25 for additional steps [17]. Indeed, there may be a relationship between low quality health  
26 information and the presence of marketing for products and services.[18,19] A key skill for  
27 individuals is the ability to distinguish between trustworthy sources of health information  
28 and unreliable purveyors of misinformation. Misinformation is a concern for various  
29 reasons, particularly where it may be relied on by people making health-related decisions.  
30 Consumer protection and truth-in-advertising laws have been proposed as potentially  
31 useful avenues of response to health misinformation,[20] as has greater use of professional  
32 discipline to govern the conduct of providers who are members of regulated health  
33 professions, with a particular focus on physicians.[21]  
34  
35  
36

37 In order to evaluate the potential utility of these and other related strategies, it is  
38 important to understand, first, what kinds of healthcare providers (beyond physicians) are  
39 purportedly providing these unproven interventions, and second, how these services are  
40 being marketed to the public (i.e. are the claims being made potentially inaccurate or  
41 misleading?). Identifying the professional status of those involved in the marketing of  
42 unproven stem cell-based interventions is necessary for ascertaining whether or not they  
43 are subject to professional regulation, and if so, what relevant rules govern their conduct in  
44 this field. At the same time, gathering data on the specific nature of the claims being made  
45 will highlight where existing consumer protection and truth-in-advertising laws may be  
46 triggered.  
47  
48  
49

50 The ways in which CAM practitioners (as well as interdisciplinary clinics featuring CAM  
51 practitioners) use stem cells to market their services and the nature of the claims they are  
52 making are understudied. Given the trend of CAM practitioners framing themselves as  
53 primary care providers,[22,23] and their tendencies to offer unproven interventions,[24]  
54 we hypothesized that such practitioners have begun to offer unproven stem cell therapies,  
55 and that they might make potentially misleading marketing claims about them. This raises  
56  
57  
58  
59  
60

1  
2  
3 potential safety concerns – particularly if the practitioner is not adequately trained in the  
4 relevant procedure. In addition, marketing of this kind raises the issue of  
5 “scienceploitation”. [25] “Scienceploitation” occurs when popular scientific ideas, such as  
6 stem cells, are used to take advantage of the social capital associated with them and induce  
7 consumer interest in products or services. It is a potentially harmful practice that can  
8 mislead the public and damage public trust in legitimate science. “Scienceploitation” is  
9 related to but distinct from hype, as the former goes beyond mere exaggeration and creates  
10 misunderstandings and/or posits false connections.  
11  
12

13  
14 Improving understanding about CAM involvement in the private stem cell market will  
15 support identification and evaluation of available policy options in this field, and will also  
16 contribute to broader considerations of issues associated with the marketing of CAM  
17 products and services in general. Accordingly, the goal of this research was to identify CAM  
18 providers advertising stem cell-related interventions via publicly accessible websites, and  
19 then to map the types of claims being made about those interventions. We first sought to  
20 identify relevant clinic websites using search terms focused on CAM practitioner types (e.g.  
21 “naturopaths”) and common CAM terminology (e.g. “holistic”), and then to analyze the  
22 information presented on those clinic websites about stem cells and stem cell-related  
23 therapies.  
24  
25

## 26 **Methods**

27  
28  
29 In order to establish a dataset of web domains owned by relevant clinics offering stem cell-  
30 related interventions, multiple searches were undertaken in November 2016 on  
31 Google.com, with personalized results disabled. The search terms were: naturopath stem  
32 cell, acupuncturist stem cell, homeopath stem cell, chiropractor stem cell, midwife stem  
33 cell, natural stem cell, alternative stem cell, holistic stem cell, and complementary stem cell.  
34 For each search term, we attempted to identify 60 clinic websites in order of appearance;  
35 however, in some cases (e.g. for the search “complementary stem cell”) the Google search  
36 results terminated before producing 60 clinic websites. Only web domains for clinics or  
37 practitioners with physical addresses were included as results. Supplement shops lacking a  
38 clinical component were excluded.  
39  
40

41  
42 Once all the websites were collected, duplicates were identified and removed. Websites  
43 were shortened to their basic domain name (e.g. stemcellclinic.com/about\_us would be  
44 shortened to stemcellclinic.com), and combined into a unified dataset of 403 unique web  
45 domains. We chose in our methodology to sort the clinic web domains by coding categories,  
46 such as practitioner type, rather than by the search terms under which they appeared. This  
47 prevented miscategorization in instances where a practitioner type appeared that was  
48 different from the search term. For example, naturopath clinic websites were found in the  
49 “acupuncturist stem cell” search. Therefore, information connecting a web domain to the  
50 search term in which it occurred was discarded.  
51  
52

53  
54 A coding frame – that is, a framework for analyzing specific language content on the  
55 websites and converting it to numerical data for analysis – was developed using both  
56 inductive and deductive methodologies, and content analysis was then performed. [26] The  
57  
58  
59

coding frame is summarized in Text Box 1. Coding of the websites was undertaken between February 2017 and May 2017. Initially, each web domain was manually searched to determine the country in which the clinic was located, as well as the type(s) of practitioners advertised (e.g., naturopath, midwife, medical doctor, etc). Subsequently, domain-specific Google searches were undertaken in the form of “stem cell site:URL”, to identify all mentions of stem cells in each domain. Coders then applied the coding frame to the domain by analyzing all webpages linked from the Google search results. Excerpts were copied to note examples of the statements and claims present.

During coding, it became clear that several of the domains had become non-functional, had redirected to a different unrelated domain, no longer contained any mention of stem cells, or on closer analysis were not clinic websites (e.g. blogs, online stores, etc). These domains were excluded, leaving a final sample of 368 web domains to analyze.

#### **Text Box 1 – Coding Frame Summary**

1. In what country is the physical address listed on the clinic website located?
2. What practitioner types are listed as clinic staff on the web domain? Choose all that apply. (see Table 5 for coding categories)
3. What types of stem cell therapies or products, as defined by the claimed source of the stem cells and their mode of usage, are marketed? Choose all that apply. (see Table 4 for coding categories)
4. What categories of conditions are targeted by the therapies advertised? Choose all that apply. (see Table 3 for coding categories) Notes on coding categories:
  - The “Other Illness/Disease” category is defined as diseases or maladies including autoimmune disorders, degenerative conditions, genetic disorders, infectious diseases, and environmental harms, other than chronic conditions primarily affecting on the bones, joints and muscles
  - The “Aging” category includes issues related to aging that are not cosmetic or aesthetic. This clearly distinguishes it from the “Cosmetic” category
5. What other treatments mentioning stem cells but not actually consisting of using them are marketed? Choose all that apply. (see Table 2 for coding categories)
6. Are there any statements relating to the stem cell therapy or therapies indicating there is evidence of inefficacy?
7. Are there any statements relating to the stem cell therapy or therapies indicating there is limited evidence of efficacy?
8. Are there any statements relating to the stem cell therapy or therapies indicating the general risks of the procedure? (e.g. minor risk of infection from injection, minor risk of allergic response, side effects of pain or soreness, etc.)
9. Are there any statements relating to the stem cell therapy or therapies indicating the risks specific to the mode of therapy? (e.g., worsening joint pain or joint malfunction caused by the injection of stem cells, unintended growth of different tissue, etc.)
10. Are there any statements relating to the stem cell therapy or therapies indicating regulatory status (e.g. FDA approved or not, etc).
11. Are there any statements relating to the stem cell therapy or therapies indicating that the therapy is experimental or unproven?
12. Are there any statements relating to the stem cell therapy or therapies that use hype language? This is defined as exaggerated or extreme language when speaking about potential benefits, e.g. breakthrough, revolution/revolutionary, cure, incredible, amazing, magical, etc.

## **Results**



Of the 368 web domains, 243 marketed stem cell therapies, and 116 marketed other interventions where stem cells were mentioned in the description of the treatment or its effects (e.g. stem cells were “activated”, or “stimulated”), including platelet rich plasma injections (88), prolotherapy (19) and others (9). Many websites advertised stem cell transplantation from multiple sources, such as adipose-derived (112), bone marrow-derived (100), blood-derived (28), umbilical cord-derived (26), and others. Plant stem cell-based treatments and products (e.g. skin creams) (20) were also advertised. Tables 1 and 2 summarize the types of therapies offered, and provide excerpts from selected websites as examples.

**Table 1: Modes of Stem Cell Therapy Offered (Among Web Domains Marketing Stem Cell Therapies, n=243)**

| Therapy Type                                                           | # of Web Domains | % of Web Domains | Example (Excerpt)                                                                                                                                                                                                                                                                                                                                                 |
|------------------------------------------------------------------------|------------------|------------------|-------------------------------------------------------------------------------------------------------------------------------------------------------------------------------------------------------------------------------------------------------------------------------------------------------------------------------------------------------------------|
| Adipose-Derived Autologous Stem Cell Transplantation Therapy           | 112              | 46.09            | "Adipose Derived Stem Cell (ADSC) Therapy: Adult stem cell injection is a groundbreaking treatment for orthopedic injury and other common causes of musculoskeletal pain, osteoarthritis, back or neck injury and joint pain —and, in many cases, it may be the preferred alternative to orthopedic surgery." - centerforintegratedmed.com                        |
| Bone Marrow-Derived Autologous Stem Cell Transplantation Therapy       | 100              | 41.15            | "My clinical practice mission is to use autologous concentrated marrow-derived mononuclear cells for the care and treatment of a joint afflicted by degenerative arthritis so as to assist a patient in postponing, perhaps avoiding a joint replacement." - sheinkopmd.com                                                                                       |
| Plant Stem Cell Therapies and Products                                 | 20               | 8.23             | "Gemmotherapy—made from plant stem cells, they have the ability to detoxify, nourish, and regenerate tissues in the body." - demarcohomeopathy.com                                                                                                                                                                                                                |
| Circulating Blood-Derived Autologous Stem Cell Transplantation Therapy | 28               | 11.52            | "We perform a large blood draw (usually about 300cc) from which we harvest stem cells. [...] Once the stem cells have multiplied, they are washed and screened again. The implantation is very simple and practically painless. The stem cells are simply injected under the skin into the lymphatic system where they can spread out in the body." - infusio.org |
| Umbilical Cord Blood-Derived Stem Cell Transplantation Therapy         | 26               | 10.70            | "The body's immune system is unable to recognize umbilical cord-derived mesenchymal stem cells as foreign and therefore they are not rejected. HUCT stem cells have been administered thousands of times at the Puhua Hospital and there has never been a single instance rejection (graft vs. host disease)." - puhuahospital.com                                |

|       |    |       |                                                                                                                                                                                                                                                                                                                                                                                                                                                                                                                                                                                                                                                                                                                                                        |
|-------|----|-------|--------------------------------------------------------------------------------------------------------------------------------------------------------------------------------------------------------------------------------------------------------------------------------------------------------------------------------------------------------------------------------------------------------------------------------------------------------------------------------------------------------------------------------------------------------------------------------------------------------------------------------------------------------------------------------------------------------------------------------------------------------|
| Other | 35 | 14.40 | <p>1. "Frequently Asked Questions: Why does Dr. Gonzalez use human term placenta stem cells (HTPSCS) as opposed to umbilical cord blood, fat cells from the same sick person or cells from discarded embryos or aborted fetuses?"<br/>- integramedicalcenter.com</p> <p>2. "Disclaimer: All American Healthcare New Orleans does not use any stem cells that originate from an embryo. All of our stem cells used in stem cell therapy and regenerative medicine originate from the amniotic sac and amniotic fluid."<br/>- neworleans.allamericanhealthcare.net</p> <p>3. "Patients may receive between 1 to 12 injections. The amount of cells per injections varies between 5 Million to 20 Million of Embryonic Stem Cells." - a1stemcells.com</p> |
|-------|----|-------|--------------------------------------------------------------------------------------------------------------------------------------------------------------------------------------------------------------------------------------------------------------------------------------------------------------------------------------------------------------------------------------------------------------------------------------------------------------------------------------------------------------------------------------------------------------------------------------------------------------------------------------------------------------------------------------------------------------------------------------------------------|

**Table 2: Other Treatments Offered That Reference Stem Cells (Among All Web Domains, n=368)**

| Treatment Type       | # of Web Domains | % of Web Domains | Example (Excerpt)                                                                                                                                                                                                                                                                                                                                                                                                                                                                                                                                                                                       |
|----------------------|------------------|------------------|---------------------------------------------------------------------------------------------------------------------------------------------------------------------------------------------------------------------------------------------------------------------------------------------------------------------------------------------------------------------------------------------------------------------------------------------------------------------------------------------------------------------------------------------------------------------------------------------------------|
| None                 | 267              | 72.55            | N/A                                                                                                                                                                                                                                                                                                                                                                                                                                                                                                                                                                                                     |
| Platelet Rich Plasma | 88               | 23.91            | "PRP injections result in a robust release of healing growth factors as well as attraction of autologous stem cells to regenerate the site of injury." - corewellnesspdx.com                                                                                                                                                                                                                                                                                                                                                                                                                            |
| Prolotherapy         | 19               | 5.16             | "The leading form of Prolotherapy is Platelet Rich Plasma; also known as PRP Prolotherapy. Platelets are part of our circulating blood, and they control blood clotting. Platelets also contain "Platelet Derived Growth Factors". These growth factors stimulate dormant stem cells to regrow injured or worn painful joints." - drwik.com [Note: prolotherapy and PRP are related and were often mentioned together]                                                                                                                                                                                  |
| Other                | 9                | 2.45             | "Patients who undergo oxygen therapy either sit in a hyperbaric room or a one-person hyperbaric clear, plastic tube, depending upon the illness that is being treated. In either situation, the air pressured in the chamber is increased two or three times. The increase in air pressure allows the lungs to gather more oxygen than normal, subsequently allowing the blood to carry this extra oxygen throughout the body. The increase in oxygen helps to fight bacteria and stimulates the release of growth factors and stem cells, substances that help to promote healing." - painendshere.com |

Treatment targets for stem cell treatments varied, but were most commonly pain/injury relating to the bones, joints and muscles (182), illness (diseases or maladies including autoimmune disorders, degenerative conditions, genetic disorders, infectious diseases, and environmental harms, other than chronic conditions primarily affecting on the bones, joints and muscles) (82), cosmetic concerns (52), non-cosmetic aging (44) and sexual enhancement (18). Table 3 summarizes treatment targets and provides excerpts showing examples of claims noted.

**Table 3: Advertised Stem Cell Treatment Targets (Among Web Domains Marketing Stem Cell Therapies, n=243)**

| Treatment Target Type         | # of Web Domains | % of Web Domains | Example (Excerpt)                                                                                                                                                                                                                                                                                                                                                                                                                                                                                                                                                                                                                                                                                                                                                                                                                                                                                                                                                                                                                                        |
|-------------------------------|------------------|------------------|----------------------------------------------------------------------------------------------------------------------------------------------------------------------------------------------------------------------------------------------------------------------------------------------------------------------------------------------------------------------------------------------------------------------------------------------------------------------------------------------------------------------------------------------------------------------------------------------------------------------------------------------------------------------------------------------------------------------------------------------------------------------------------------------------------------------------------------------------------------------------------------------------------------------------------------------------------------------------------------------------------------------------------------------------------|
| Unspecified                   | 6                | 2.47             | N/A                                                                                                                                                                                                                                                                                                                                                                                                                                                                                                                                                                                                                                                                                                                                                                                                                                                                                                                                                                                                                                                      |
| Pain/Injury (Musculoskeletal) | 182              | 74.90            | "These treatments enhance the natural cycles of repair in chronically injured joints, ligaments and tendons. Regenerative injections are an effective treatment for all manner of acute and chronic back and neck pain, as well as osteoarthritis and injuries to the hip, knee, shoulder, elbow, wrist, foot and ankle." - myctm.org                                                                                                                                                                                                                                                                                                                                                                                                                                                                                                                                                                                                                                                                                                                    |
| Other Illness/Disease         | 82               | 33.74            | 1. "The Lung Institute offers stem cell treatment for many major pulmonary conditions, including chronic obstructive pulmonary disease (COPD), emphysema, chronic bronchitis, pulmonary fibrosis and interstitial lung disease." - lunginstitute.com<br>2. "In Dr. Steenblock's experience the use of the patient's own bone marrow is the safest, simplest, and cheapest method to treat CHF [congestive heart failure] with stem cells and in his opinion gets consistently good or better results than those more expensive and risky methods of treatment described above." - personalized-regenerative-medicine.com<br>3. "Stem Cells - This treatment has great therapeutic potential given to the cells ability in regulating the immune system, regenerating tissues and organs and preventing pathologies." - flordelasalud.com<br>4. "Stem Cell Vaccine Therapy can be used with other surgical interventions to replace post surgical chemotherapy, or can be used as a stand alone treatment if indicated." - stemcelltreatmentinstitute.com |
| Cosmetic                      | 52               | 21.40            | "The natural stem cell breast augmentations with stem cell-enriched autologous fat is an outpatient procedure performed under local anesthesia." - liposuctionthailand.org                                                                                                                                                                                                                                                                                                                                                                                                                                                                                                                                                                                                                                                                                                                                                                                                                                                                               |
| Aging                         | 44               | 18.11            | "Thai Regen offers stem cell therapy and other medical and holistic healing treatments in Thailand (Bangkok and Chiang Mai) for the prevention and treatment of degenerative disease as well as for anti-aging and body rejuvenation." - thairegen.com                                                                                                                                                                                                                                                                                                                                                                                                                                                                                                                                                                                                                                                                                                                                                                                                   |
| Sexual Enhancement            | 18               | 7.41             | "There are exciting new treatment options for men suffering from erectile dysfunction that can provide natural and lasting results without medication, including stem cell therapy." - innovativecosmeticsurgery.com                                                                                                                                                                                                                                                                                                                                                                                                                                                                                                                                                                                                                                                                                                                                                                                                                                     |
| Other                         | 7                | 2.88             | "It's a system that totally defies traditional addiction treatment. Instead of administering another addictive medicine, we use plant-based medicine, stem cells, super foods, Ibogaine and Ayahuasca as part of the system." - theholisticsanctuary.com                                                                                                                                                                                                                                                                                                                                                                                                                                                                                                                                                                                                                                                                                                                                                                                                 |

The majority of the clinics from the sample were located in the United States (see Table 4). Also, despite using CAM-focused search terms and not searching specifically for medical doctors, over half of the web domains marketing stem cell therapies featured medical doctors (130). Sixty-six (66) of the 368 websites featured medical doctors along with at least one CAM practitioner. Other common practitioner types included chiropractors (53), naturopaths (44) and acupuncturists (20). Table 5 summarizes the practitioner types noted in the results.

1  
2  
3  
4  
5  
6  
7  
8  
9  
10  
11  
12  
13  
14  
15  
16  
17  
18  
19  
20  
21  
22  
23  
24  
25  
26  
27  
28  
29  
30  
31  
32  
33  
34  
35  
36

| Country              | Full Sample,<br>n=368 |       | Only Clinics<br>Offering Stem<br>Cell<br>Therapies,<br>n=243 |       |
|----------------------|-----------------------|-------|--------------------------------------------------------------|-------|
|                      | Totals                | %     | Totals                                                       | %     |
| United States        | 295                   | 80.16 | 208                                                          | 85.60 |
| India                | 19                    | 5.16  | 8                                                            | 3.29  |
| Canada               | 14                    | 3.80  | 7                                                            | 2.88  |
| Australia            | 8                     | 2.17  | 2                                                            | 0.82  |
| Mexico               | 7                     | 1.90  | 6                                                            | 2.47  |
| United Kingdom       | 7                     | 1.90  | 1                                                            | 0.41  |
| Thailand             | 6                     | 1.63  | 4                                                            | 1.65  |
| China                | 3                     | 0.82  | 2                                                            | 0.82  |
| Isreal               | 2                     | 0.54  | 0                                                            | 0.00  |
| Denmark              | 2                     | 0.54  | 2                                                            | 0.82  |
| United Arab Erimates | 1                     | 0.27  | 1                                                            | 0.41  |
| Netherlands          | 1                     | 0.27  | 1                                                            | 0.41  |
| Serbia               | 1                     | 0.27  | 1                                                            | 0.41  |
| Lithuania            | 1                     | 0.27  | 0                                                            | 0.00  |
| Ireland              | 1                     | 0.27  | 0                                                            | 0.00  |
| Pakistan             | 1                     | 0.27  | 1                                                            | 0.41  |
| Hong Kong            | 1                     | 0.27  | 1                                                            | 0.41  |
| New Zealand          | 1                     | 0.27  | 1                                                            | 0.41  |

37  
38  
39  
40  
41  
42  
43  
44  
45  
46  
47  
48  
49  
50  
51  
52  
53  
54  
55  
56  
57  
58  
59  
60

| Practitioner      | Full Sample,<br>n=368 |       | Only Clinics<br>Offering Stem<br>Cell<br>Therapies,<br>n=243 |       |
|-------------------|-----------------------|-------|--------------------------------------------------------------|-------|
|                   | Totals                | %     | Totals                                                       | %     |
| Medical Doctor    | 161                   | 43.75 | 130                                                          | 53.50 |
| Naturopath        | 63                    | 17.12 | 44                                                           | 18.11 |
| Chiropractor      | 61                    | 16.58 | 53                                                           | 21.81 |
| Acupuncturist     | 36                    | 9.78  | 20                                                           | 8.23  |
| Midwife           | 33                    | 8.97  | 0                                                            | 0.00  |
| Homeopath         | 27                    | 7.34  | 8                                                            | 3.29  |
| Massage Therapist | 13                    | 3.53  | 13                                                           | 5.35  |
| Aesthetician      | 9                     | 2.45  | 7                                                            | 2.88  |

|                  |    |       |    |       |
|------------------|----|-------|----|-------|
| Registered Nurse | 7  | 1.90  | 6  | 2.47  |
| Ayurvedic Doctor | 2  | 0.54  | 1  | 0.41  |
| Other            | 74 | 20.11 | 57 | 23.46 |
| Not Specified    | 34 | 9.24  | 22 | 9.05  |

A low percentage of the domains advertising stem cell therapies stated that there was limited evidence of efficacy of the interventions (18.93%), or that there was evidence of inefficacy (12.76%). Only some domains mentioned general risks associated with an intervention (such as the small risk of infection or allergic reaction from injecting a substance with a needle) (24.69%), and even fewer mentioned risks specific to the mode of therapy (such as the potential to cause further damage to a joint by injecting cells into it) (5.76%). A minority of domains mentioned the regulatory (e.g. FDA) status of the intervention (30.86%), and only 33.33% noted that the therapy is experimental or unproven. Hype language, defined as exaggerated or extreme language when speaking about potential benefits (e.g. breakthrough, revolutionary, cure, incredible, amazing, magical, etc.) was found on 31.69% of the web domains offering stem cell therapies. See Table 6 for greater detail on the disclosures made on the web domains, and for examples of excerpts.

| Claim/Language Used                               | YES | NO  | % (YES) | % (NO) | Example (Excerpt) fulfilling "Yes" Coding Selection                                                                                                                                                                                                                                                                                                                                                                                                                                                                                                                                                                                                                                                                                                     |
|---------------------------------------------------|-----|-----|---------|--------|---------------------------------------------------------------------------------------------------------------------------------------------------------------------------------------------------------------------------------------------------------------------------------------------------------------------------------------------------------------------------------------------------------------------------------------------------------------------------------------------------------------------------------------------------------------------------------------------------------------------------------------------------------------------------------------------------------------------------------------------------------|
| States Evidence of Inefficacy                     | 31  | 212 | 12.76%  | 87.24% | "Those who undergo stem cell treatment normally have about a 15% likelihood of receiving no benefits from stem cell treatment."<br>- regenorthoclinic.com                                                                                                                                                                                                                                                                                                                                                                                                                                                                                                                                                                                               |
| States That There is Limited Evidence of Efficacy | 46  | 197 | 18.93%  | 81.07% | "Stem cells have the potential to cure the disease from its root; however it is not approved by FDA as proven results are not yet available."<br>- stemgenn.com                                                                                                                                                                                                                                                                                                                                                                                                                                                                                                                                                                                         |
| States General Risks                              | 60  | 183 | 24.69%  | 75.31% | "Any time you penetrate the skin there is a small risk of infection. Our procedures are performed using strict aseptic techniques, so infection is rare, occurring in only about 1 of every 10,000 patients. Other possible complications include allergic reactions to local anesthetic and bleeding, and both are extremely rare."<br>- dhpmcharlotte.com                                                                                                                                                                                                                                                                                                                                                                                             |
| States Risks Specific to Mode of Therapy          | 14  | 229 | 5.76%   | 94.24% | "There are certain unavoidable risks and potential side effects and complications to the Treatments, including without limitation swelling; increased pain; bleeding; dizziness, numbness; scarring; scar or keloid formation; asymmetry; allergic reaction; discoloration; soreness, itching, a feeling of "lumpiness" or permanent skin contour irregularities at the site of Treatments;, all of which may be permanent. Treatment may very rarely cause infection; injury to nerves, temporary or permanent alteration in sensation; the need for additional surgery or hospitalization; spinal cord injuries, pneumothorax (temporary lung collapse), paralysis, or other serious or debilitating injuries or death" - mairegenerativemedicine.com |

|                                            |    |     |        |        |                                                                                                                                                                                                                                                                                                                                                                                                                                                                                                                                                                                                                                                                                                                                                                         |
|--------------------------------------------|----|-----|--------|--------|-------------------------------------------------------------------------------------------------------------------------------------------------------------------------------------------------------------------------------------------------------------------------------------------------------------------------------------------------------------------------------------------------------------------------------------------------------------------------------------------------------------------------------------------------------------------------------------------------------------------------------------------------------------------------------------------------------------------------------------------------------------------------|
| States Regulatory Status                   | 75 | 168 | 30.86% | 69.14% | "The Food and Drug Administration (FDA) has NOT approved the use of adult stem cells/SVF for any disorder. The Cell Surgical Network and its affiliate treatment centers are not offering stem cell therapy as a cure for any condition, disease, or injury. No statements or implied treatments on this website have been evaluated or approved by the FDA. This website contains no medical advice." - innovationsstemcellcenter.com                                                                                                                                                                                                                                                                                                                                  |
| States Therapy is Experimental or Unproven | 81 | 162 | 33.33% | 66.67% | "That being said, the cutting edge stem cell therapy is still considered experimental. Stem cells are currently being studied in many arenas, and the prospect for health improvement using stem cells is great, but many results at this point have only been studying on very few patients. We perform stem cell therapy for the benefit of our patients, and are not involved in any clinical trials." - drandrewlipton.com                                                                                                                                                                                                                                                                                                                                          |
| Uses Hype Language                         | 77 | 166 | 31.69% | 68.31% | 1. "Researchers have finally found the "fountain of youth" and it can regenerate your bodily processes by ridding you of all sorts of degenerative diseases and aging cells." - stemgenn.com<br>2. "A Revolution in Biologics: There is a major gap for orthopedic treatment options between conservative treatment and surgery. Platelet Rich Plasma and stem cells from Bone Marrow Concentrate offer a therapeutic treatment option." - sheinkopmd.com<br>3. - "Breakthrough Healing for Degenerative Diseases and Chronic Ailments: Are you tired of trying traditional treatment options with little to no change? Do you want to avoid costly, painful surgery? Stem cell therapy could be the answer you're looking for!" - neworleans.allamericanhealthcare.net |

Intercoder reliability testing was completed for 79 of the 368 entries, or 21.47% of the sample. Kappa scores were calculated based on intercoder agreement, and are summarized in Table 7. The scores reflect substantial to perfect agreement between coders.[27]

|                                                    |        |
|----------------------------------------------------|--------|
| Practitioner                                       | 0.8665 |
| Modes of Stem Cell Therapy Offered                 | 0.9672 |
| Advertised Stem Cell Treatment Targets             | 0.9009 |
| Other Treatments Offered That Reference Stem Cells | 0.9268 |
| States Evidence of Inefficacy                      | 1.0000 |
| States That There is Limited Evidence of Efficacy  | 1.0000 |
| States General Risks                               | 1.0000 |
| States Risks Specific to Mode of Therapy           | 1.0000 |
| States Regulatory Status                           | 0.9617 |
| States Therapy is Experimental or Unproven         | 0.9660 |
| Uses Hype Language                                 | 1.0000 |



Selected examples of stem cell-related claims, sorted by practitioner type listed on the relevant web domain, are included in Table 8.

**Table 8: Selected Examples of Stem Cell-Related Claims Made, by Practitioner Type Listed on Website**

| Practitioner Type | Examples of Claims                                                                                                                                                                                                                                                                                                                                                                                                                                                                                                                                                                                                                                                                 |
|-------------------|------------------------------------------------------------------------------------------------------------------------------------------------------------------------------------------------------------------------------------------------------------------------------------------------------------------------------------------------------------------------------------------------------------------------------------------------------------------------------------------------------------------------------------------------------------------------------------------------------------------------------------------------------------------------------------|
| Medical Doctor    | "When it comes to Regenerative Orthopedics, stem cells are a game changer. They make our regenerative injection techniques much more effective. Stem cell therapy is the strongest, fastest and most effective regenerative stimulus we have." -regenortho.com                                                                                                                                                                                                                                                                                                                                                                                                                     |
| Naturopath        | "Our regenerative and biological treatments include Prolotherapy, Platelet Rich Plasma PRP, and Adult Stem Cell Therapies. These treatments enhance the natural cycles of repair in chronically injured joints, ligaments and tendons. Regenerative injections are an effective treatment for all manner of acute and chronic back and neck pain, as well as osteoarthritis and injuries to the hip, knee, shoulder, elbow, wrist, foot and ankle. For our patients who have been told that their only solution is surgery or a life on pain medications, the vast majority have been able to achieve drug-free, pain-free function without surgery joint replacement." -myctm.org |
| Acupuncturist     | "This QiGong form has proven scientific effects of stimulating and activating adult stem cells in our bone marrow; gently elongating and improving flexibility of the spine, alleviating neck, back and joint pain." -taoistacupuncture.com                                                                                                                                                                                                                                                                                                                                                                                                                                        |
| Chiropractor      | "Stem Cell Therapy: If you are suffering with chronic pain, this new breakthrough treatment could change your life! Eliminate knee pain with the industry's latest proven alternative to surgery and steroids." -activephysicalmedicine.com                                                                                                                                                                                                                                                                                                                                                                                                                                        |
| Homeopath         | "Every day, Marnie supports women in restoring health and well-being to their digestive systems using homeopathy and Plant Stem Cells so they have the energy to do the things they love." -resplendenthealing.com                                                                                                                                                                                                                                                                                                                                                                                                                                                                 |
| Midwife           | "Cord blood contains magical stem cells, and the idea is that if your baby becomes ill in the future you may be able to use these cells as treatment." -katybirthcenter.com                                                                                                                                                                                                                                                                                                                                                                                                                                                                                                        |
| Ayurvedic Doctor  | "Experts say, "Successful regenerative medicine centered on human cells could potentially replace a number of major molecular pharmaceuticals and medical prostheses." Heart Cardiac myocytes possess the capacity for regeneration after heart attacks. Heart tissue can also be regenerated from stem cells derived from bone marrow." -ayurvedicscience.com                                                                                                                                                                                                                                                                                                                     |
| Aesthetician      | "ARGAN PLANT STEM CELLS: These are the first plant stem cells with proven effectiveness for deep-seated cell protection and rejuvenation. Clinical results confirm Argan Stem Cells reduce wrinkles by 26% while tightening, toning and improving skin density." -jadeholisticspa.com                                                                                                                                                                                                                                                                                                                                                                                              |
| Registered Nurse  | "Stem cells can be found in every tissue in every human body, but are especially concentrated in bone marrow, blood, and adipose(fatty) cells. Stems cells are what make regenerative therapies like PRP therapy so effective; by harvesting cells from fatty tissue in this new treatment, we can send 10,000x more stem cells into your body than PRP therapy!" -drandrewlipton.com (RN's were only featured alongside other practitioners; Andrew Lipton is an osteopath)                                                                                                                                                                                                       |
| Massage Therapist | "From Aloe Vera to L-Ascorbic Acid to Peptides and Plant Stem Cells, every ingredient in my formulas works in harmony with the skin's natural processes." -bodhiholisticspa.com                                                                                                                                                                                                                                                                                                                                                                                                                                                                                                    |

1  
2  
3  
4  
5  
6  
7  
8  
9  
10  
11  
12  
13  
14  
15  
16  
17  
18  
19  
20  
21  
22  
23  
24  
25  
26  
27  
28  
29  
30  
31  
32  
33  
34  
35  
36  
37  
38  
39  
40  
41  
42  
43  
44  
45  
46  
47  
48  
49  
50  
51  
52  
53  
54  
55  
56  
57  
58  
59  
60

Other

1. (Pharmacist) "Stem Cell Worx Intraoral Spray is the world's only natural stem cell supplement in an intramural spray, and it's available at The Compounding Pharmacy of Beverly Hills today. It is designed specifically to activate your own adult stem cells naturally and provides robust immunity."  
-compoundingexpert.com
2. "The marrow is rich in Mesenchymal Stem Cells, which are responsible for healing damaged tissues. The stems cells are isolated from the marrow sample and platelets are isolated from the blood sample. After preparation, these two components will be reinjected directly into the damaged area of the joint using advanced imaging guidance. This ensures the cells are delivered to the exact location of need."  
-louisvillebodyworks.com

## Discussion

This research was undertaken to determine the extent to which CAM practitioners are involved in online advertising of stem cell-related interventions, what kinds of claims and services are made, and what relevant scientific, ethical and legal disclosures accompany these representations. The results show that CAM practitioners are now highly involved in advertising these interventions, often advertise medically serious procedures such as autologous bone marrow stem cell transplantation, and largely fail to make reasonable and essential disclosures.

Indeed, it is concerning that the majority of the web domains advertising stem cell-related interventions did not include disclosures about scientific evidence of efficacy (or lack thereof), about general and/or specific risks associated with the intervention(s) offered, about the experimental nature of the treatments, or about their regulatory status. This finding is consistent with past research on the marketing of stem cell therapies, which has indicated similar deficiencies and potentially problematic advertising practices.[13,28-30] Failing to provide accurate and complete information may impact potential patients' ability to give informed consent to treatment, and exaggerated claims, including potentially false, misleading or deceptive promotion, may risk running afoul of marketing regulations.

Adipose-derived autologous stem cell transplantation was the most common type of therapy advertised (Table 1). This may reflect the fact that the procedure to remove fat tissue is generally less intensive and invasive than extracting bone marrow, though the latter was also popular. Together, these two forms of therapy comprised the dominant offerings observed. Yet, there can be safety issues with these therapies as noted by bodies like the International Society of Stem Cell Research and many are not approved by national regulatory institutions.[4,5]

The health targets of stem cell therapies largely consisted of chronic conditions like musculoskeletal pain and deterioration, and this extended to the "Other Illness/Disease" category, where conditions like chronic obstructed pulmonary disorder and congestive heart failure were targeted. This distribution reflects a common demographic of individuals who may have unmet medical needs (e.g., pain not satisfactorily remedied by conventional treatment), for whom conventional medicine can provide neither an effective solution nor satisfactory relief from daily symptoms.[31] A strong secondary focus on arguably less medically serious conditions related to aging, cosmetics and sexuality also reflects the creep of these multibillion dollar industries into the realm of stem cells.[32]

1  
2  
3 It is notable to see how many CAM practitioners are offering stem cell-related  
4 interventions, or in some other way using stem cells to market their products or services.  
5 Of course, it is important to distinguish interventions involving stem cell injections and  
6 those that merely reference stem cells for advertising effect (or in some cases, potentially  
7 for scientifically justified reasons). The former can present serious physical risks to  
8 patients receiving injections, and while the latter can also cause harm, they tend to be less  
9 invasive and lower risk. Stem cell science, research and clinical application are very  
10 specialized, and it is highly unlikely that the broad array of CAM practitioners noted in this  
11 study each have the requisite expertise to work with stem cells in a safe and effective  
12 manner.[6] In some cases, and depending on the jurisdiction, these practitioners are either  
13 unregulated, regulated less stringently than medical doctors, or have been granted self-  
14 regulation but have failed to either establish and/or enforce any clearly defined evidence-  
15 based standard of care.[33] Professional regulation – including self-regulation – of CAM  
16 providers is growing,[34,35] though there remains concern about a lack of appropriate  
17 oversight.[30] Where a particular category of CAM practitioners is professionally regulated,  
18 employing professional oversight and discipline may be one option for controlling  
19 problematic practices. However, the ability and willingness of CAM regulators to set and  
20 enforce relevant standards in this context remains to be seen. At present it seems likely  
21 that other strategies – such as the use of consumer protection and truth-in-advertising laws  
22 – may be more readily available and broadly relevant.

23  
24  
25  
26  
27  
28 Despite our focus on CAM in the methodology and the presence of many CAM practitioners  
29 marketing stem cell therapies in our results, we were surprised that medical doctors were  
30 still the most common practitioner type noted. These results highlight again the critical role  
31 the medical community and its regulatory bodies, such as medical colleges, have in  
32 ensuring physicians are not engaging in unprofessional conduct with respect to their  
33 clinical or marketing practices.[8,17,36-38]

34  
35  
36 In this research, we found that 116 web domains advertised non-stem cell interventions  
37 with language that references stem cells (see Table 2 for examples), which was arguably  
38 done in order to leverage the excitement surrounding stem cell science in order to market  
39 products. The application of truth-in-advertising laws may be one way to ensure that  
40 claims made are not false or misleading in a material respect,[39] and thus do not  
41 contribute to this kind of inappropriate “scienceploitation”.

42  
43  
44 Many countries around the world have laws and policies, supported by enforcement  
45 agencies, prohibiting demonstrably false or misleading marketing claims.[19] For example,  
46 In the United States, the Federal Trade Commission regulates marketing claims using the  
47 *Federal Trade Commission Act*, and prohibits “deceptive and unfair acts or practices”, that is  
48 to say those that mislead consumers and affect their “behavior or decisions about the  
49 product or service”.[40,41] Similarly, in Canada, the Competition Bureau enforces the  
50 *Competition Act* which requires that representations must not be false or misleading “in a  
51 material respect”, that is to say in a manner that could “influence the ordinary consumer to  
52 buy or use the advertised product or service”.[42,43] Although not without their challenges  
53 in terms of application and enforcement, these consumer protection and truth-in-  
54 advertising governance frameworks are certainly relevant to, and in some cases should be  
55  
56  
57  
58  
59

1  
2  
3 triggered by, the questionable claims found in this study, especially those regarding the  
4 safety, efficacy and the supposedly “revolutionary” quality of some interventions  
5 advertised.  
6

## 7 8 **Limitations**

9  
10 While the study covered the majority of the most common CAM providers used in the US  
11 (excepting massage therapists which were not specifically searched for given the context of  
12 stem cells, but were nonetheless noted),[44] the search terms selected did not fully  
13 encompass the gamut of existing CAM practitioner types, omitting many less common  
14 types, including reiki providers, reflexologists, etc. Moreover, given the fact that the search  
15 was undertaken in the English language on the American version of the Google search  
16 engine, there may have been an overrepresentation of American and/or English-speaking  
17 clinics. As mentioned in the methods, the coding frame was applied only to the specific  
18 webpages on web domains where the term “stem cell” was found by Google, and not to the  
19 entirety of existing content on a given domain. It is possible that broad disclaimers and  
20 other relevant information were therefore excluded. Finally, our research focus was on  
21 exploring how, and by whom, stem cells are used to market health services and  
22 interventions. Though we did not evaluate claims against peer-reviewed scientific  
23 literature and thus cannot make any definitive statements as to the accuracy of any of the  
24 marketing claims, in future research this important task could be undertaken.  
25  
26  
27  
28

## 29 **Conclusion**

30  
31 Our research indicates that clinics using stem cell language to advertise their services do so  
32 in many different forms, for many different conditions, and often without disclosing  
33 evidence, risks, or regulatory information. Many CAM practitioners are now actively  
34 involved in offering and advertising stem cell-based interventions, often alongside  
35 physicians. Professional regulation may provide one avenue of oversight and enforcement  
36 for problematic conduct, but its application will be limited to regulated health professionals  
37 and impacted considerably by the strength (and will) of the regulatory regime. The  
38 questionable nature of many of the claims we found, along with the absence of important  
39 qualifying information, suggests consumer protection and truth-in-advertising regulations  
40 are highly relevant to this market and indeed could prove very useful in constraining some  
41 of the more egregious marketing practices identified. The applicability of these regulatory  
42 regimes do not depend on the professional status of those advertising the services and  
43 rather typically focus on the general impression the representation conveys to the  
44 public.[45]  
45  
46  
47  
48

49 The use of consumer protection and truth-in-advertising regulation to curtail misleading  
50 advertising in the private, direct-to-consumer market for stem cell interventions is an area  
51 well worth further research and consideration. Important questions will include how  
52 existing legal and policy tools could be used to regulate the claims made by clinics  
53 advertising stem cell-related interventions, and how to effectively enforce the law among  
54 clinics or individual practitioners that engage in misleading marketing practices –  
55 particularly given the cross-border nature of this market. A related issue that also bears  
56  
57  
58  
59

1  
2  
3 monitoring is how the practices of clinics offering unproven stem cell interventions relate  
4 to concerns about “scienceploitation” and its potential harms. Many clinics seem to be  
5 engaging in scienceploitation, which can seriously obfuscate public discourse, mislead the  
6 public, and make it difficult to discern real science from marketing claims that merely  
7 reference scientific sounding terminology. The marketing of unproven stem cell therapies  
8 has the potential to harm patients, and to harm the reputation of stem cell science. It is  
9 incumbent upon regulators and policy makers to take a proactive approach to managing  
10 the risks associated with the growing private market for stem cell-related interventions,  
11 and addressing misleading marketing practices is an important part of this strategy.  
12  
13

## 14 15 **References**

- 16  
17 1. International Society for Stem Cell Research. ISSCR 2017 Highlights New Discoveries  
18 in Stem Cell Research & Progress Toward Clinical Therapies. 25 April 2017. Accessed  
19 July 14, 2017. [http://www.isscr.org/home/about-us/news-press-](http://www.isscr.org/home/about-us/news-press-releases/2016/2017/04/25/isscr-2017-highlights-new-discoveries-in-stem-cell-research-progress-toward-clinical-therapies)  
20 [releases/2016/2017/04/25/isscr-2017-highlights-new-discoveries-in-stem-cell-](http://www.isscr.org/home/about-us/news-press-releases/2016/2017/04/25/isscr-2017-highlights-new-discoveries-in-stem-cell-research-progress-toward-clinical-therapies)  
21 [research-progress-toward-clinical-therapies](http://www.isscr.org/home/about-us/news-press-releases/2016/2017/04/25/isscr-2017-highlights-new-discoveries-in-stem-cell-research-progress-toward-clinical-therapies)  
22
- 23 2. Guzzo RM, O’Sullivan MB. Human Pluripotent Stem Cells: Advances in Chondrogenic  
24 Differentiation and Articular Cartilage Regeneration. *Current Molecular Biology*  
25 *Reports*. 2016 Sep 1;2(3):113-22.  
26
- 27 3. Caulfield T, Sipp D, Murry CE, Daley GQ, Kimmelman J. Confronting stem cell hype.  
28 *Science*. 2016 May 13;352(6287):776-7.  
29
- 30 4. International Society for Stem Cell Research. Patient Handbook on Stem Cell  
31 Therapies. December 3, 2008. Accessed July 14, 2017.  
32 [http://www.closerlookatstemcells.org/docs/default-source/patient-](http://www.closerlookatstemcells.org/docs/default-source/patient-resources/patient-handbook---english.pdf?sfvrsn=4)  
33 [resources/patient-handbook---english.pdf?sfvrsn=4](http://www.closerlookatstemcells.org/docs/default-source/patient-resources/patient-handbook---english.pdf?sfvrsn=4)  
34
- 35 5. A Closer Look at Stem Cells. Nine Things To Know About Stem Cell Treatments  
36 (ISSCR). 2015. Accessed July 14, 2017. [http://www.closerlookatstemcells.org/stem-](http://www.closerlookatstemcells.org/stem-cells-and-medicine/nine-things-to-know-about-stem-cell-treatments)  
37 [cells-and-medicine/nine-things-to-know-about-stem-cell-treatments.](http://www.closerlookatstemcells.org/stem-cells-and-medicine/nine-things-to-know-about-stem-cell-treatments)  
38
- 39 6. Daley GQ. Polar Extremes in the Clinical Use of Stem Cells. *N Engl J Med*.  
40 2017;376:1075-77.  
41
- 42 7. Deans RJ, Gunter KC, Dominici M, Forte M. Part 5: Unproven cell therapies and the  
43 commercialization of cell-based products. *Cytotherapy*. 2016 Jan 1;18(1):138-42.  
44
- 45 8. Ikonou L, Freishtat RJ, Wagner DE, Panoskaltis-Mortari A, Weiss DJ. The global  
46 emergence of unregulated stem cell treatments for respiratory diseases. *Professional*  
47 *societies need to act. Annals of the American Thoracic Society*, 2016; 13(8): 1205-  
48 1207).  
49
- 50 9. Berger I, Ahmad A, Bansal A, et al. Global Distribution of Businesses Marketing Stem  
51 Cell-Based Interventions. *Cell Stem Cell*, 2016; 4: 158-162.  
52
- 53 10. U.S. Food & Drug Administration. Vaccines, Blood & Biologics; Cellular & Gene  
54 Therapy Products; Approved Products; Marketed Products. January 17, 2017.  
55 Accessed July 14, 2017.  
56 [https://www.fda.gov/BiologicsBloodVaccines/CellularGeneTherapyProducts/Appro-](https://www.fda.gov/BiologicsBloodVaccines/CellularGeneTherapyProducts/ApprovedProducts/default.htm)  
57 [vedProducts/default.htm](https://www.fda.gov/BiologicsBloodVaccines/CellularGeneTherapyProducts/ApprovedProducts/default.htm)  
58  
59  
60



11. Ogbogu U, Rachul C, Caulfield T. Reassessing direct-to-consumer portrayals of unproven stem cell therapies: is it getting better? *Regenerative medicine*. 2013 May;8(3):361-9.
12. RegenBerg A, Hutchinson L, Schanker B, Mathews D. Medicine on the Fringe: Stem Cell-Based Interventions in Advance of Evidence. *Stem Cells*. 2009. 27, 2312-2319.
13. Turner L, Knoepfler P. Selling stem cells in the USA: assessing the direct-to-consumer industry. *Cell Stem Cell*. 2016 Aug 4;19(2):154-7.
14. Berger I, Ahmad A, Bansal A, et al. Global Distribution of Businesses Marketing Stem Cell-Based Interventions. *Cell Stem Cell*, 2016; 4: 158-162.
15. The Cystic Fibrosis Foundation. Stem Cell Therapies and Research for Cystic Fibrosis. March 9, 2015. Accessed August 22, 2017. <https://www.cff.org/News/News-Archive/2015/Stem-Cell-Therapies-and-Research-for-Cystic-Fibrosis/>
16. Rosemann A, Sleeboom-Faulkner M. New regulation for clinical stem cell research in China: expected impact and challenges for implementation. *Regenerative Medicine*. 2016 11(1): 5-9.
17. Sipp D, Caulfield T, Kaye J, Barfoot J, Blackburn C, Chan S, De Luca M, Kent A, McCabe C, Munsie M, Sleeboom-Faulkner M. Marketing of unproven stem cell-based interventions: A call to action. *Science Translational Medicine*. 2017 Jul 5;9(397):eaag0426.
18. Health on the Net Foundation. The commitment to reliable health and medical information on the internet. Accessed November 16, 2017. <http://www.hon.ch/HONcode/Patients/Visitor/visitor.html>
19. Chang DT, Abouassaly R, Lawrentschuk N. Quality of health information on the internet for urolithiasis on the Google search engine. *Advances in urology*. 2016 Dec 4;2016.
20. Ogbogu U. Combating Unlicensed Stem Cell Interventions Through Truthful Advertising Law: A Survey of Regulatory Trends. *McGill Journal of Law and Health*. 2016. 9(2): 311-335.
21. Zarzeczny A, Caulfield T, Ogbogu U, et al. Professional Regulation: A Potentially Valuable Tool in Responding to "Stem Cell Tourism". *Stem Cell Reports*. 2014. 3(3): 379-384.
22. California Naturopathic Doctors Association. Naturopathic Doctors are Primary Care Doctors. CNDA. Accessed November 15, 2017. <http://www.calnd.org/files/CNDA%20NDs%20are%20Primary%20Care%20Doctors%20FINAL%202-18-13.pdf>
23. The American Association of Naturopathic Physicians. What is a Naturopathic Doctor? AANP. 2017. Accessed November 15, 2017. <http://www.naturopathic.org/content.asp?contentid=60>
24. Caulfield T, Rachul C. Supported by science?: what Canadian naturopaths advertise to the public. *Allergy, Asthma & Clinical Immunology*. 2011 Sep 15;7(1):14.
25. Caulfield T. Blinded by Science: Modern-day hucksters are cashing in on vulnerable patients. *The Walrus*, Sept. 12, 2011. Accessed July 19, 2017. <https://thewalrus.ca/blinded-by-science/>
26. Elo S, Kyngäs H. The qualitative content analysis process. *Journal of advanced nursing*. 2008 Apr 1;62(1):107-15.



- 1
  - 2
  - 3
  - 4
  - 5
  - 6
  - 7
  - 8
  - 9
  - 10
  - 11
  - 12
  - 13
  - 14
  - 15
  - 16
  - 17
  - 18
  - 19
  - 20
  - 21
  - 22
  - 23
  - 24
  - 25
  - 26
  - 27
  - 28
  - 29
  - 30
  - 31
  - 32
  - 33
  - 34
  - 35
  - 36
  - 37
  - 38
  - 39
  - 40
  - 41
  - 42
  - 43
  - 44
  - 45
  - 46
  - 47
  - 48
  - 49
  - 50
  - 51
  - 52
  - 53
  - 54
  - 55
  - 56
  - 57
  - 58
  - 59
  - 60
27. McHugh ML. Interrater reliability: the kappa statistic. *Biochemia medica*. 2012 Oct 15;22(3):276-82.
28. D. Lau, U. Ogbogu, B. Taylor, T. Stafinski, D. Menon, T. Caulfield, Stem cell clinics online: The direct-to- consumer portrayal of stem cell medicine. *Cell Stem Cell* 3, 591–594 (2008).
29. Fujita M, Hatta T, Ozeki R, Akabayashi A. The current status of clinics providing private practice cell therapy in Japan. *Regenerative medicine*. 2016 Jan;11(1):23-32.
30. Regenber AC, Hutchinson LA, Schanker B, Mathews DJ. Medicine on the fringe: stem cell-based interventions in advance of evidence. *Stem Cells*. 2009 Sep 1;27(9):2312-9.
31. Artus M, Croft P, Lewis M. The use of CAM and conventional treatments among primary care consultants with chronic musculoskeletal pain. *BMC family practice*. 2007 May 4;8(1):26.
32. Business Wire. Research and Markets: Global Cosmetics Market 2015-2020: Market was \$460 Billion in 2014 and is Estimated to Reach \$675 Billion by 2020. July 27, 2015. <https://www.businesswire.com/news/home/20150727005524/en/Research-Markets-Global-Cosmetics-Market-2015-2020-Market>
33. C Weeks. Are we being served by the regulation of naturopaths? Not if patients are still being misled. *The Globe and Mail*. April 28 2016. Accessed July 14, 2017. <https://www.theglobeandmail.com/life/health-and-fitness/health/canadian-naturopaths-need-to-follow-the-rules-if-they-want-regulation/article29785140/>
34. Gilmour J, Kelner M, Wellman B. Opening the door to Complementary and Alternative Medicine: Self-Regulation in Ontario. *Law and Policy*. 2002. 24(2): 149-174.
35. Welsh S, et al. Moving forward? Complementary and alternative practitioners seeking self-regulation. *Sociology of Health & Illness*. 2004. 26(2): 216-241.
36. Medical Board of California (MBC). (2007). In the Matter of the Accusation against Darryl Matthew See, M.D. Division of Medical Quality, Medical Board of California, Department of Consumer Affairs, State of California. Case No. 04-2004-161179. <http://www.casewatch.org/board/med/see/surrender.pdf>.
37. SMC (Singapore Medical Council). Disciplinary Inquiry for Dr. Wong Yoke Meng. November 3, 2010. [http://www.healthprofessionals.gov.sg/content/dam/hprof/smc/docs/press\\_releases/14.Press%20Release\\_Dr%20Wong%20Yoke%20Meng\\_3Nov10.pdf](http://www.healthprofessionals.gov.sg/content/dam/hprof/smc/docs/press_releases/14.Press%20Release_Dr%20Wong%20Yoke%20Meng_3Nov10.pdf)
38. SMC (Singapore Medical Council). Press Release: Disciplinary inquiry for Dr. Wong Yoke Meng. November 9, 2010. [http://www.healthprofessionals.gov.sg/content/dam/hprof/smc/docs/press\\_releases/15.Press%20Release\\_Dr%20Wong%20Yoke%20Meng4\\_9Nov10.pdf](http://www.healthprofessionals.gov.sg/content/dam/hprof/smc/docs/press_releases/15.Press%20Release_Dr%20Wong%20Yoke%20Meng4_9Nov10.pdf).
39. Competition Act, R.S.C. 1985, c. C-34, s. 74.01(1)(a).
40. Federal Trade Commission. (2000) Advertising and Marketing on the Internet: Rules of the Road. Accessed July 14, 2017. <https://www.ftc.gov/tips-advice/business-center/guidance/advertising-marketing-internet-rules-road>
41. Federal Trade Commission. (2016) Federal Trade Commission Act Sect 5: Unfair or Deceptive Acts or Practices. (<https://www.federalreserve.gov/boarddocs/supmanual/cch/ftca.pdf>)
42. Competition Act, RSC 1985, c C-34

- 1
- 2
- 3
- 4 43. Competition Bureau, "False and Misleading Representations and Deceptive Marketing
- 5 Practices under the Competition Act" (3 November 2011), online:
- 6 <http://www.competitionbureau.gc.ca/eic/site/cb-bc.nsf/eng/03133.html>
- 7 44. Barnes PM, Bloom B, Nahin R. CDC National Health Statistics Report
- 8 #12. Complementary and Alternative Medicine Use Among Adults and Children:
- 9 United States, 2007. December 10, 2008.
- 10 45. Competition Bureau. False or Misleading Representations and Deceptive Marketing
- 11 Practices. <http://www.competitionbureau.gc.ca/eic/site/cb-bc.nsf/eng/03133.html>.
- 12
- 13
- 14
- 15
- 16
- 17
- 18
- 19
- 20
- 21
- 22
- 23
- 24
- 25
- 26
- 27
- 28
- 29
- 30
- 31
- 32
- 33
- 34
- 35
- 36
- 37
- 38
- 39
- 40
- 41
- 42
- 43
- 44
- 45
- 46
- 47
- 48
- 49
- 50
- 51
- 52
- 53
- 54
- 55
- 56
- 57
- 58
- 59
- 60

1STROBE Statement—Checklist of items that should be included in reports of *cross-sectional studies*

|                                                          | <b>Item No</b> | <b>Recommendation</b>                                                                                                                                                                                                                                                                                                                                                         |
|----------------------------------------------------------|----------------|-------------------------------------------------------------------------------------------------------------------------------------------------------------------------------------------------------------------------------------------------------------------------------------------------------------------------------------------------------------------------------|
| <b>Title and abstract</b>                                | 1              | <b>P.1 (a)</b> Indicate the study's design with a commonly used term in the title or the abstract<br><b>P.1 (b)</b> Provide in the abstract an informative and balanced summary of what was done and what was found                                                                                                                                                           |
| <b>Introduction</b>                                      |                |                                                                                                                                                                                                                                                                                                                                                                               |
| Background/rationale                                     | 2              | <b>P.2-3</b> Explain the scientific background and rationale for the investigation being reported                                                                                                                                                                                                                                                                             |
| Objectives                                               | 3              | <b>P.3</b> State specific objectives, including any prespecified hypotheses                                                                                                                                                                                                                                                                                                   |
| <b>Methods</b>                                           |                |                                                                                                                                                                                                                                                                                                                                                                               |
| Study design                                             | 4              | <b>P.3-4</b> Present key elements of study design early in the paper                                                                                                                                                                                                                                                                                                          |
| Setting                                                  | 5              | <b>P.3-4</b> Describe the setting, locations, and relevant dates, including periods of recruitment, exposure, follow-up, and data collection                                                                                                                                                                                                                                  |
| Participants                                             | 6              | <b>N/A (a)</b> Give the eligibility criteria, and the sources and methods of selection of participants                                                                                                                                                                                                                                                                        |
| Variables                                                | 7              | <b>P.3-4</b> Clearly define all outcomes, exposures, predictors, potential confounders, and effect modifiers. Give diagnostic criteria, if applicable                                                                                                                                                                                                                         |
| Data sources/ measurement                                | 8*             | <b>P.3-4</b> For each variable of interest, give sources of data and details of methods of assessment (measurement). Describe comparability of assessment methods if there is more than one group                                                                                                                                                                             |
| Bias                                                     | 9              | <b>P.4</b> Describe any efforts to address potential sources of bias                                                                                                                                                                                                                                                                                                          |
| Study size                                               | 10             | <b>P.3-4</b> Explain how the study size was arrived at                                                                                                                                                                                                                                                                                                                        |
| Quantitative variables                                   | 11             | <b>N/A</b> Explain how quantitative variables were handled in the analyses. If applicable, describe which groupings were chosen and why                                                                                                                                                                                                                                       |
| Statistical methods <b>N/A</b><br><b>(Kappa on P.10)</b> | 12             | <b>(a)</b> Describe all statistical methods, including those used to control for confounding<br><b>(b)</b> Describe any methods used to examine subgroups and interactions<br><b>(c)</b> Explain how missing data were addressed<br><b>(d)</b> If applicable, describe analytical methods taking account of sampling strategy<br><b>(e)</b> Describe any sensitivity analyses |
| <b>Results</b>                                           |                |                                                                                                                                                                                                                                                                                                                                                                               |
| Participants <b>N/A</b>                                  | 13*            | <b>(a)</b> Report numbers of individuals at each stage of study—eg numbers potentially eligible, examined for eligibility, confirmed eligible, included in the study, completing follow-up, and analysed<br><b>(b)</b> Give reasons for non-participation at each stage<br><b>(c)</b> Consider use of a flow diagram                                                          |
| Descriptive data <b>N/A</b>                              | 14*            | <b>(a)</b> Give characteristics of study participants (eg demographic, clinical, social) and information on exposures and potential confounders<br><b>(b)</b> Indicate number of participants with missing data for each variable of interest                                                                                                                                 |
| Outcome data <b>P.4-11</b>                               | 15*            | Report numbers of outcome events or summary measures                                                                                                                                                                                                                                                                                                                          |
| Main results <b>N/A</b>                                  | 16             | <b>(a)</b> Give unadjusted estimates and, if applicable, confounder-adjusted estimates and their precision (eg, 95% confidence interval). Make clear which confounders were adjusted for and why they were included                                                                                                                                                           |

|                          |    |                                                                                                                                                                            |
|--------------------------|----|----------------------------------------------------------------------------------------------------------------------------------------------------------------------------|
|                          |    | (b) Report category boundaries when continuous variables were categorized                                                                                                  |
|                          |    | (c) If relevant, consider translating estimates of relative risk into absolute risk for a meaningful time period                                                           |
| Other analyses P.6       | 17 | Report other analyses done—eg analyses of subgroups and interactions, and sensitivity analyses                                                                             |
| <b>Discussion</b>        |    |                                                                                                                                                                            |
| Key results P.12         | 18 | Summarise key results with reference to study objectives                                                                                                                   |
| Limitations P.13         | 19 | Discuss limitations of the study, taking into account sources of potential bias or imprecision. Discuss both direction and magnitude of any potential bias                 |
| Interpretation P.12-13   | 20 | Give a cautious overall interpretation of results considering objectives, limitations, multiplicity of analyses, results from similar studies, and other relevant evidence |
| Generalisability P.12-14 | 21 | Discuss the generalisability (external validity) of the study results                                                                                                      |
| <b>Other information</b> |    |                                                                                                                                                                            |
| Funding P.2              | 22 | Give the source of funding and the role of the funders for the present study and, if applicable, for the original study on which the present article is based              |

\*Give information separately for exposed and unexposed groups.

**Note:** An Explanation and Elaboration article discusses each checklist item and gives methodological background and published examples of transparent reporting. The STROBE checklist is best used in conjunction with this article (freely available on the Web sites of PLoS Medicine at <http://www.plosmedicine.org/>, Annals of Internal Medicine at <http://www.annals.org/>, and Epidemiology at <http://www.epidem.com/>). Information on the STROBE Initiative is available at [www.strobe-statement.org](http://www.strobe-statement.org).
